# Supplementary material for: Coated Cotton Fabrics with Antibacterial and Anti-Inflammatory Silica Nanoparticles for Improving Wound Healing
Source: PubMed Central journal article supplement (PMC10982928; doi:10.1021/acsami.4c00383), 2024-03-12
Supplement: am4c00383_si_001.pdf [file am4c00383_si_001.pdf]

# Supporting Information

## Coated Cotton Fabrics with Antibacterial and Anti-inflammatory Silica Nanoparticles for Improving Wound Healing

Ming Liu,<sup>a</sup> Axel Guinart,<sup>a</sup> Albert Granados,<sup>a</sup> Carolina Gimbert-Suriñach,<sup>a</sup> Ester Fernández,<sup>b</sup> Roser Pleixats,<sup>a\*</sup> Adelina Vallribera<sup>a\*</sup>

<sup>a</sup>Department of Chemistry and Centro de Innovación en Química Avanzada (ORFEO-CINQA), Universitat Autònoma de Barcelona, Cerdanyola del Vallès, 08193 Barcelona, Spain.

Email: [adelina.vallribera@uab.es](mailto:adelina.vallribera@uab.es); Email: [roser.pleixats@uab.cat](mailto:roser.pleixats@uab.cat)

<sup>b</sup>Departament de Biologia Cel·lular, Fisiologia i Immunologia, Universitat Autònoma de Barcelona, Cerdanyola del Vallès, 08193 Barcelona, Spain

### *Table of Contents*

|                                                                                                                                                       |    |
|-------------------------------------------------------------------------------------------------------------------------------------------------------|----|
| 1. General Considerations .....                                                                                                                       | 2  |
| 2. Preparation and description of compounds 2a-c .....                                                                                                | 3  |
| 3. NMR and IR spectra .....                                                                                                                           | 8  |
| 4. Preparation and characterization of functionalized silica nanoparticles and fabrics .....                                                          | 16 |
| 5. Treatment of functionalized silica nanoparticle SiO <sub>2</sub> @Norflox-Ibu (40:1) with proteases for quantitative analysis by UV-Vis .....      | 32 |
| 6. Treatment of functionalized silica nanoparticle SiO <sub>2</sub> @Norflox-Ibu (40:1) with proteases for qualitative detection of Norfloxacin ..... | 32 |
| 7. Treatment of cotton fabrics coated with functionalized silica nanoparticles with proteases                                                         | 33 |
| 8. Inhibitory tests of bacterial growth .....                                                                                                         | 33 |

## 1. General considerations

All chemicals were purchased from Fluorochem and Merck, and they were used without further purification, unless specified. The  $^1\text{H}$ ,  $^{13}\text{C}$  and  $^{19}\text{F}$  NMR spectra were recorded at 298 K on 360 and 400 MHz Bruker DPX or a 400 MHz Bruker Avance-III equipped with a BBFO probe with an automatic tuning. All the spectra were calibrated using the residual solvent signal ( $\text{CDCl}_3$ ,  $\delta_{\text{H}}$ , 7.26 and  $\delta_{\text{C}}$ , 77.16 ppm). Chemical shift data were expressed in ppm and coupling constant ( $J$ ) values in Hz. Multiplicity of peaks was abbreviated as s (singlet), d (doublet), t (triplet), q (quartet), dd (doublet of doublets) and m (multiplet). The  $^{13}\text{C}$ -CPMAS was acquired from a 400 MHz Bruker NEO spectrometer at 10 KHz spinning rate, ns 15360 (18h), d1=2s. Cross-Polarization mixing time was set to 1 ms. Externally calibrated with adamantane sample (29.5 ppm). Spectra processed with a line broadening 20. The  $^{29}\text{Si}$ -CPMAS was obtained from a 400 MHz Bruker NEO spectrometer at 10 KHz spinning rate, ns 15360 (15h), d1=1s. Cross-Polarization mixing time was set to 1ms. Externally calibrated with DSS sample (0 ppm). Spectra processed with a line broadening 40. FTIR spectroscopy was recorded with a Bruker Tensor 27 spectrometer using a Golden Gate ATR module with a diamond window. High resolution mass spectra were obtained by direct injection of the sample with electrospray techniques in Hewlett-Packard 5989A and microTOF-Q instruments, respectively. Elemental analysis of C, N, and H were performed using Flash 2000 Organic Elemental analyzer of Thermo Fisher Scientific with BBOT as an internal standard. Transmission electron microscopy (TEM) analyses were performed on a JEM-2011 Electron Microscope at 200 kV. Scanning electron microscopy (SEM), energy-dispersive X-ray spectroscopy (EDX), and element line scans mapping were taken on a Zeiss Merlin scanning electron microscope (SEM) with an INCA energy dispersive X-ray (EDX) detector from Oxford Instruments. Dynamic light scattering (DLS) and zeta potential measurements have been performed using a Zetasizer Nano ZS (Malvern Instruments) with 10 mg of silica NPs in 10 mL of Milli-Q water.

## 2. Preparation and description of compounds 2a-c

### Synthesis of (S)-2-(4-isobutylphenyl)-N-(3-(triethoxysilyl)propyl)propenamide, **2a**

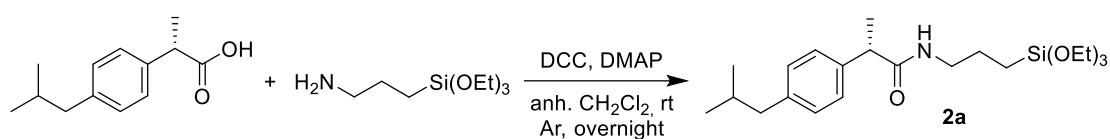

Ibuprofen (206 mg, 1 mmol) was placed in a Schlenk under argon atmosphere. Then, DMAP (6 mg, 5 mol %), DCC (206 mg, 1 mmol, 1 equiv) and dry dichloromethane (5 mL) were added, and the solution was stirred until homogenization. Then 3-(triethoxysilyl)propan-1-amine (266 mg, 1.2 mmol) was introduced by syringe. The reaction was allowed to proceed under stirring at room temperature until completion (TLC monitoring). The crude mixture was poured into water and extracted with dichloromethane. The combined organic phase was washed with brine, dried with anhydrous sodium sulphate, and evaporated under vacuum. The residue was purified by silica gel column chromatography (hexane:ethyl acetate = 3:1) to afford **2a** in 50% yield (205 mg, 0.5 mmol) spectroscopic data matches with those previously reported.<sup>1</sup>

<sup>1</sup>H NMR (400 MHz, CDCl<sub>3</sub>) δ (ppm): 7.19 (d, *J* = 7.9 Hz, 2H), 7.10 (d, *J* = 7.9 Hz, 2H), 5.62 (s, 1H), 3.51 (q, *J* = 7.2 Hz, 1H), 3.19 (q, *J* = 6.4 Hz, 2H), 2.45 (d, *J* = 7.2 Hz, 2H), 1.85 (dt, *J* = 13.5, 6.7 Hz, 1H), 1.57 – 1.47 (m, 5H), 1.19 (t, *J* = 7.0 Hz, 9H), 0.90 (d, *J* = 6.6 Hz, 6H), 0.51 (dd, *J* = 9.7, 6.6 Hz, 2H).

### Synthesis of (S)-9-fluoro-3-methyl-10-(4-methylpiperazin-1-yl)-7-oxo-N-(3-(triethoxysilyl)propyl)-2,3-dihydro-7H-[1,4]oxazino[2,3,4-ij]quinoline-6-carboxamide, **2b**

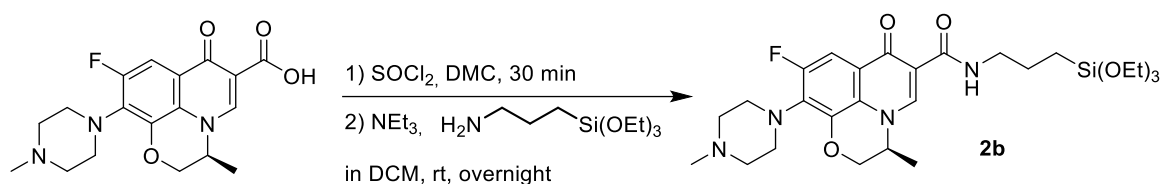

*Step 1:* Levofloxacin (362 mg, 1.0 mmol, 1 equiv.) was introduced in the Schlenk under argon atmosphere in 10 mL of anhydrous CH<sub>2</sub>Cl<sub>2</sub>. Then, 1.5 equiv. of SOCl<sub>2</sub> (179 mg, 1.5 mmol, 1.5 equiv) were added and let it react at rt under argon atmosphere for half an hour. Then the solution was evaporated to dryness to remove the solvent and excess of SOCl<sub>2</sub>. The crude mixture was directly used for the next step.

<sup>1</sup> Li, H.; Granados, A.; Fernández, E.; Pleixats, R.; Vallribera, A. Anti-inflammatory Cotton Fabrics and Silica Nanoparticles with Potential Topical Medical Applications. *ACS Applied Materials & Interfaces* **2020**, *12*, 25658-25675.

**Step 2:** The remaining solid was dissolved in 5 mL of CH<sub>2</sub>Cl<sub>2</sub> and triethylamine (5.0 mmol, 5 equiv) was added. Then, 1 equiv of silylated amine (101.2 mg, 1.0 mmol, 1equiv) dissolved in 5 mL of dry CH<sub>2</sub>Cl<sub>2</sub> was added and led to react overnight. Distilled water (100 mL) was added and extractions with CH<sub>2</sub>Cl<sub>2</sub> (4x20 mL) were carried out. The organic phase was dried over anhydrous Na<sub>2</sub>SO<sub>4</sub>, filtered, and evaporated to dryness to afford **2b** in 99% (563 mg, 0.99 mmol) yield.

**<sup>1</sup>H NMR** (400 MHz, CDCl<sub>3</sub>) δ (ppm): 10.01 (s, 1H), 8.64 (s, 1H), 7.71 (d, *J* = 12.4 Hz, 1H), 4.46 – 4.37 (m, 2H), 4.37 – 4.25 (m, 1H), 3.83 (q, *J* = 6.9 Hz, 6H), 3.52 – 3.32 (m, 6H), 2.59 (s, 4H), 2.40 (s, 3H), 1.76 (p, *J* = 7.6 Hz, 2H), 1.58 (d, *J* = 6.4 Hz, 3H), 1.23 (t, *J* = 6.9 Hz, 9H), 0.73 (t, *J* = 8.2 Hz, 2H). **<sup>13</sup>C NMR** (91 MHz, CDCl<sub>3</sub>) δ (ppm): 175.3, 164.9, 155.9, 155.7 (d, *J* = 247.5 Hz), 143.8, 139.5 (d, *J* = 6.6 Hz), 131.5 (d, *J* = 14.6 Hz), 124.3, 122.6 (d, *J* = 8.8 Hz), 111.2, 105.1 (d, *J* = 24.1 Hz), 79.0, 68.2, 50.1, 46.0, 45.8, 40.3, 38.8, 28.4, 27.6, 18.3, 8.7. **<sup>19</sup>F NMR** (376 MHz, CDCl<sub>3</sub>) δ (ppm): -121.2 (d, *J* = 12.6 Hz). **IR** (ATR) ν (cm<sup>-1</sup>): 3235, 2930, 2324, 1649, 1600, 1239, 1200, 1046, 1071, 800. **HRMS** (ESI) *m/z* [M+H]<sup>+</sup> calcd for C<sub>27</sub>H<sub>42</sub>FN<sub>4</sub>O<sub>6</sub>Si 565.2852, found: 565.2851.

### Synthetic route to access **2c**

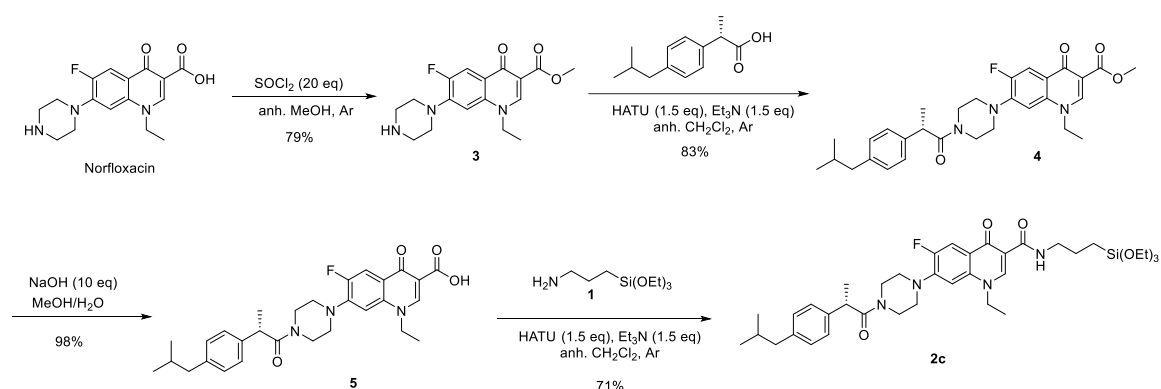

### Synthesis of methyl 1-ethyl-6-fluoro-4-oxo-7-(piperazin-1-yl)-1,4-dihydroquinoline-3-carboxylate, **3**

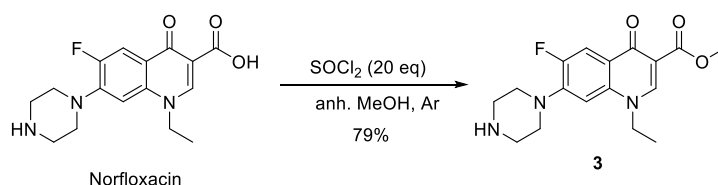

SOCl<sub>2</sub> (2.7 mL, 28.5 mmol, 20 eq) was added dropwise into a solution of norfloxacin (451 mg, 1.412 mmol, 1 eq) in 10 mL of dry methanol at 0 °C. The mixture turned to clear and was heated to reflux for 24 h. The solution was neutralized with 10% Na<sub>2</sub>CO<sub>3</sub> aqueous solution. The aqueous phase was extracted with DCM:MeOH (90:10). The organic phase was dried over anhydrous Na<sub>2</sub>SO<sub>4</sub>, filtered, and concentrated in vacuo affording the ester **3** (371 mg, 1.11 mmol, 79%) as a

white powder. The crude was directly used for the next step. The spectroscopic data matches with those previously reported.<sup>2</sup>

<sup>1</sup>H NMR (400 MHz, CDCl<sub>3</sub>) δ(ppm): 8.46 (s, 1H), 8.10 (d, *J* = 13.3 Hz, 1H), 6.76 (d, *J* = 6.8 Hz, 1H), 4.23 (q, *J* = 7.2 Hz, 2H), 3.94 (s, 3H), 3.25 (m, 4H), 3.17 – 3.07 (m, 4H), 2.09 (bs, 1H), 1.56 (t, *J* = 7.2 Hz, 3H).

*Synthesis of methyl (S)-1-ethyl-6-fluoro-7-(4-(2-(4-isobutylphenyl)propanoyl)piperazin-1-yl)-4-oxo-1,4-dihydroquinoline-3-carboxylate, 4*

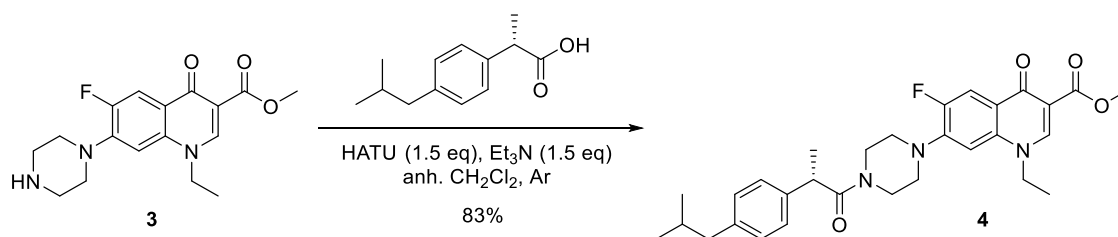

(S)-2-(4-isobutylphenyl)propanoic acid (200 mg, 1 mmol), Et<sub>3</sub>N (0.2 mL, 1.4 mmol, 1.4 equiv) and HATU (0.45 g, 1.18 mmol) were dissolved in anhydrous CH<sub>2</sub>Cl<sub>2</sub> (10 mL), the mixture was stirred for 30 minutes under argon atmosphere. Then the mixture was added to a solution of methyl 1-ethyl-6-fluoro-4-oxo-7-(piperazin-1-yl)-1,4-dihydroquinoline-3-carboxylate (323 mg, 0.97 mmol, 0.97 equiv) in dry CH<sub>2</sub>Cl<sub>2</sub> (5 mL) at room temperature and refluxed for 48 h. The reaction was monitored by TLC. The reaction mixture was quenched with water, extracted with ethyl acetate, dried over sodium sulfate and concentrated under reduced pressure to get crude compound. The obtained crude was purified by silica gel column chromatography by using EtOAc:MeOH (90:10) as eluent to afford **4** (0.42 g, 0.805 mmol, 83 %).

**MP:** 96-98 °C; <sup>1</sup>H NMR (400 MHz, CDCl<sub>3</sub>) δ (ppm): 8.37 (s, 1H), 7.90 (d, *J* = 13.2 Hz, 1H), 7.17 (d, *J* = 7.8 Hz, 2H), 7.08 (d, *J* = 7.9 Hz, 2H), 6.64 (d, *J* = 6.8 Hz, 1H), 4.15 (q, *J* = 7.3 Hz, 2H), 3.91 (m, 2H), 3.83 (s, 3H), 3.75 (s, 1H), 3.65 (s, 1H), 3.52 (s, 1H), 3.11 (s, 3H), 2.68 (s, 1H), 2.42 (d, *J* = 7.1 Hz, 2H), 1.81 (m, 1H), 1.51 – 1.39 (m, 6H), 0.85 (m, 6H). <sup>13</sup>C NMR (101 MHz, CDCl<sub>3</sub>) δ (ppm): 173.8 (d, *J* = 2.0 Hz), 172.6, 165.9, 153.0 (d, *J* = 249.5 Hz), 148.2, 144.6 (d, *J* = 10.1 Hz), 140.3, 139.1, 136.1, 129.8, 127.0, 123.4 (d, *J* = 7.1 Hz), 113.4 (d, *J* = 23.2 Hz), 109.3, 104.3, 51.9, 49.8, 49.2, 45.3, 45.0, 42.9, 41.7, 30.2, 22.41, 22.37, 20.7, 14.4. **IR** (ATR) ν (cm<sup>-1</sup>): 2951, 2866, 1723, 1693, 1617, 1486, 1432, 1315, 1221, 1091, 1019, 840, 803. **HRMS** (ESI) *m/z* [M+H]<sup>+</sup> calcd for C<sub>30</sub>H<sub>37</sub>FN<sub>3</sub>O<sub>4</sub>: 522.2763, found: 522.2762.

<sup>2</sup> Luo, X.; Wang, P. Ynylation of Acyl Radicals by Electroinduced Homolysis of 4-Acyl-1,4-dihydropyridines. *Org. Lett.* **2021**, *23*, 4960-4965.

Synthesis of (S)-1-ethyl-6-fluoro-7-(4-(2-(4-isobutylphenyl)propanoyl)piperazin-1-yl)-4-oxo-1,4-dihydroquinoline-3-carboxylic acid, **5**

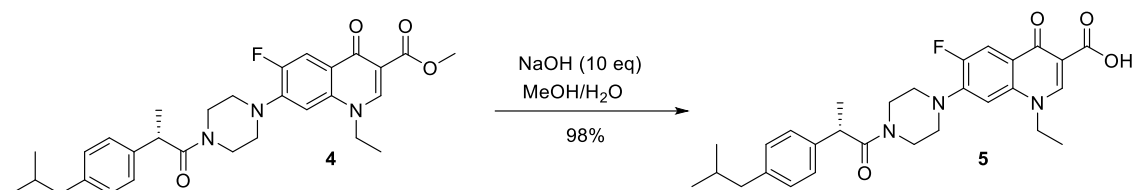

To an ice-cooled solution of ester **4** (522 mg, 1 mmol, 1 eq) in methanol (5 mL) was added 1 M NaOH aqueous solution (10 mL, 10 mmol, 10 eq). The mixture was let to stir at rt for 48 hours. Afterwards the solution was brought to pH 2-3 through the addition of 1 M HCl aqueous solution. The resulting solution was extracted with CH<sub>2</sub>Cl<sub>2</sub>, the organic extract was dried over anhydrous sodium sulfate and the solvent was removed in vacuo to afford a white powder. The product was recrystallized with CH<sub>2</sub>Cl<sub>2</sub> and hexane to afford **5** (497.5 mg, 0.98 mmol) in 98 % yield.

**MP:** 182-184 °C. **<sup>1</sup>H NMR** (400 MHz, CDCl<sub>3</sub>) δ (ppm): 8.64 (s, 1H), 8.01 (d, *J* = 12.9 Hz, 1H), 7.15 (d, *J* = 7.9 Hz, 2H), 7.09 (d, *J* = 7.8 Hz, 2H), 6.72 (d, *J* = 6.7 Hz, 1H), 4.28 (q, *J* = 7.3 Hz, 2H), 4.06 (m, 1H), 3.88 (app q, *J* = 6.8 Hz, 1H), 3.70 (m, 1H), 3.59 (m, 2H), 3.29 (m, 1H), 3.23 – 3.05 (m, 2H), 2.66 (m, 1H), 2.43 (d, *J* = 7.2 Hz, 2H), 1.82 (m, 1H), 1.55 (t, *J* = 7.2 Hz, 3H), 1.46 (d, *J* = 6.8 Hz, 3H), 0.85 (m, 6H). **<sup>13</sup>C NMR** (101 MHz, CDCl<sub>3</sub>) δ (ppm): 176.9 (d, *J* = 2.0 Hz), 172.6, 167.1, 153.4 (d, *J* = 252.5 Hz), 147.2, 145.7 (d, *J* = 11.1 Hz), 140.5, 139.0, 137.1, 129.9, 127.0, 120.8 (d, *J* = 8.1 Hz), 112.8 (d, *J* = 23.2 Hz), 108.4, 104.1 (d, *J* = 3.0 Hz), 49.8, 49.5, 45.3, 45.0, 43.1, 41.6, 30.2, 22.43, 22.40, 20.8, 14.5. **IR** (ATR) ν (cm<sup>-1</sup>): 2953, 2867, 1712, 1625, 1432, 1230, 1018, 805, 747. **HRMS** (ESI) *m/z* [M+H]<sup>+</sup> calcd for C<sub>29</sub>H<sub>35</sub>FN<sub>3</sub>O<sub>4</sub>: 508.2606, found: 508.2599. **AE:** calcd: 68.62 C, 6.75 H, 3.74 F, 8.28 N, found 68.56% C, 6.76% H, 8.12% N.

Synthesis of (S)-1-ethyl-6-fluoro-7-(4-(2-(4-isobutylphenyl)propanoyl)piperazin-1-yl)-4-oxo-N-(3-(triethoxysilyl)propyl)-1,4-dihydroquinoline-3-carboxamide, **2c**

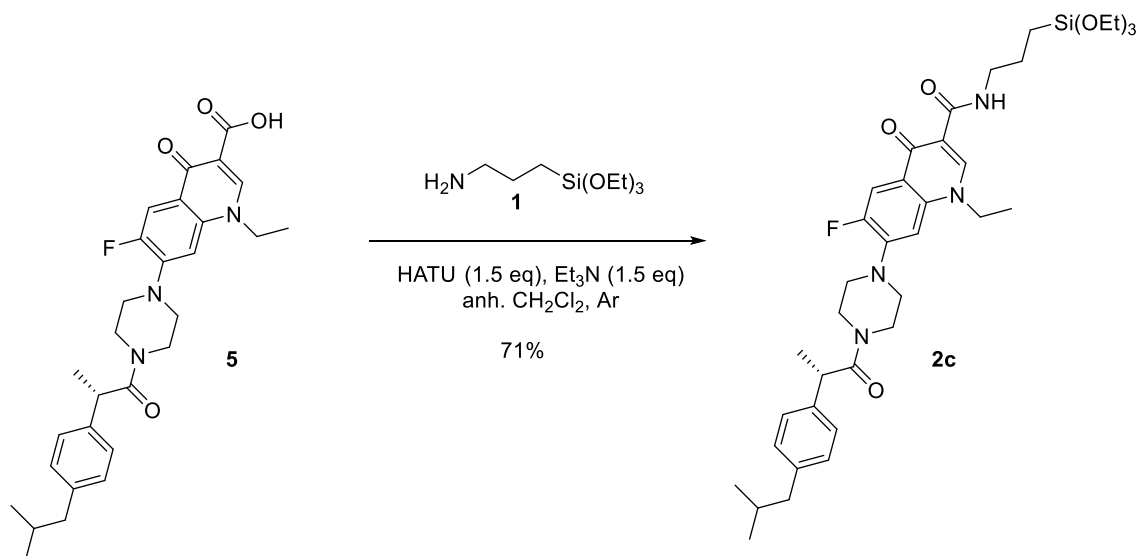

Carboxylic acid **5** (0.35 g, 0.690 mmol, 1 equiv.), Et<sub>3</sub>N (0.10 mL, 1.00 mmol, 1.4 equiv.) and HATU (0.3 g, 0.789 mol, 1.14 equiv.) were dissolved in CH<sub>2</sub>Cl<sub>2</sub> (10 mL), the mixture was stirred for 30 minutes under argon atmosphere. Then, 3-aminopropyltriethoxy silane (0.16 g, 0.723 mmol, 1.04 equiv.) was added to the solution and the solution was refluxed for 48h. The reaction was monitored by TLC. The reaction mixture was quenched with water, extracted with ethyl acetate, dried over sodium sulfate and concentrated under reduced pressure. The obtained residue was purified by silica gel column chromatography by using AcOEt : EtOH (95 : 5) as eluent to afford compound **2c** in 71 % yield (0.35 g, 0.493 mmol).

<sup>1</sup>H NMR (400 MHz, CDCl<sub>3</sub>) δ (ppm): 9.98 (t, *J* = 5.8 Hz, 1H), 8.65 (s, 1H), 7.97 (d, *J* = 13.1 Hz, 1H), 7.12 (d, *J* = 7.8 Hz, 2H), 7.05 (d, *J* = 7.8 Hz, 2H), 6.63 (d, *J* = 6.7 Hz, 1H), 4.18 (q, *J* = 7.3 Hz, 2H), 4.01 (m, 1H), 3.85 (m, 1H), 3.77 (q, *J* = 7.0 Hz, 6H), 3.65 (m, 1H), 3.54 (m, 2H), 3.40 (app q, *J* = 6.8, 2H), 3.19 (m, 1H), 3.07 (m, 2H), 2.56 (m, 1H), 2.38 (d, *J* = 7.2 Hz, 2H), 1.85 – 1.64 (m, 3H), 1.51 – 1.37 (m, 6H), 1.17 (t, *J* = 7.0 Hz, 9H), 0.81 (m, 6H), 0.67 (t, *J* = 8.2 Hz, 2H). <sup>13</sup>C NMR (101 MHz, CDCl<sub>3</sub>) δ (ppm): 175.3, 172.4, 164.8, 153.0 (d, *J* = 249.5 Hz), 146.6, 144.5 (d, *J* = 11.1 Hz), 140.4, 139.0, 136.4, 129.8, 126.92, 122.9 (d, *J* = 7.1 Hz), 113.0 (d, *J* = 23.2 Hz), 111.8, 103.9 (d, *J* = 3.0 Hz), 58.4, 50.0, 49.0, 45.3, 45.0, 43.0, 42.0, 41.6, 30.2, 23.3, 22.34, 22.30, 20.7, 18.3, 14.4, 8.0. IR (ATR) ν (cm<sup>-1</sup>): 3240, 2970, 2925, 1650, 1541, 1487, 1229, 1074, 775. HRMS (ESI) *m/z* [M+H]<sup>+</sup> calcd for C<sub>38</sub>H<sub>56</sub>FN<sub>4</sub>O<sub>6</sub>Si: 711.3948 found: 711.3946.

### 3. NMR and IR spectra

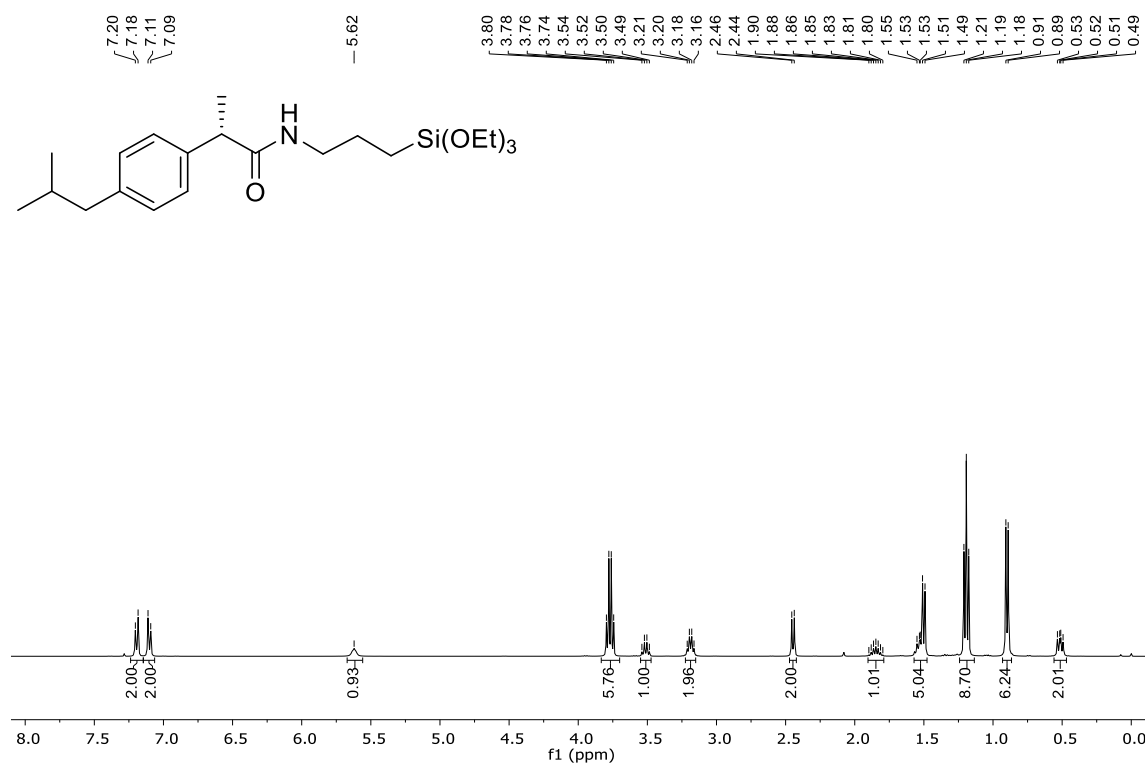

<sup>1</sup>H NMR (400 MHz, CDCl<sub>3</sub>) of compound **2a**

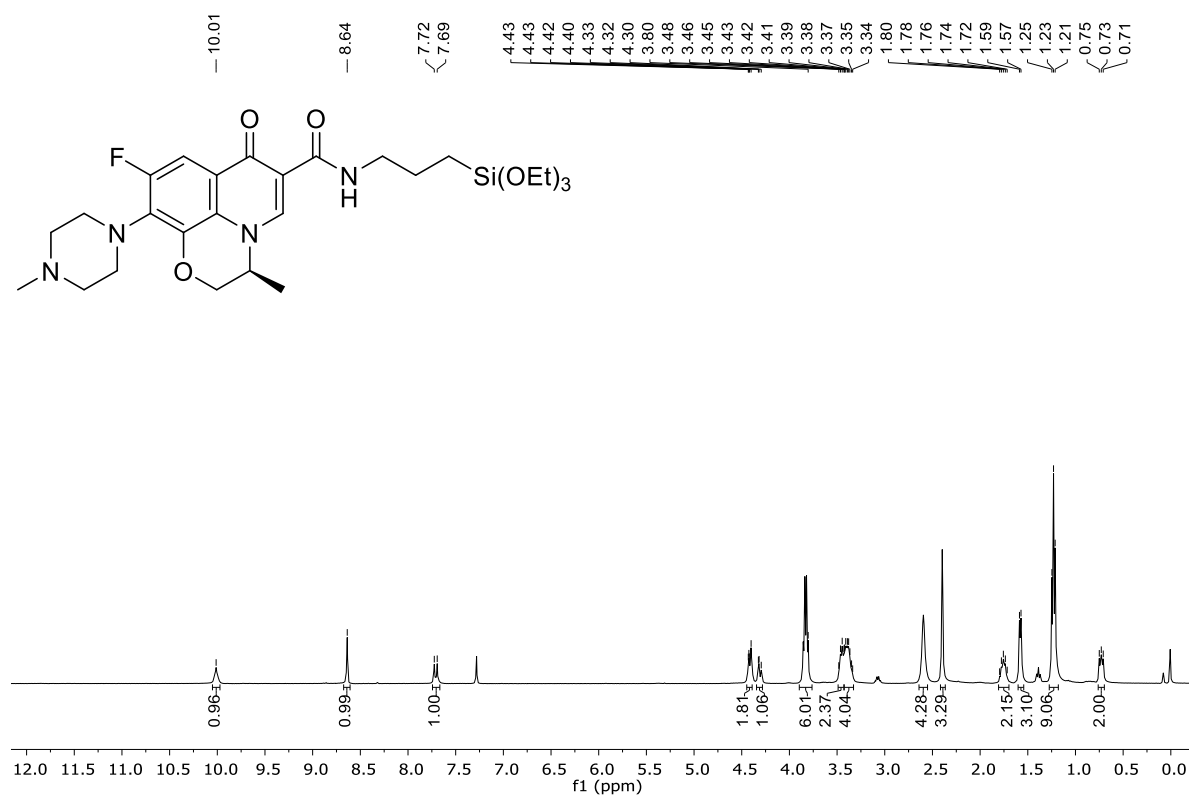

<sup>1</sup>H NMR (400 MHz, CDCl<sub>3</sub>) of compound **2b**



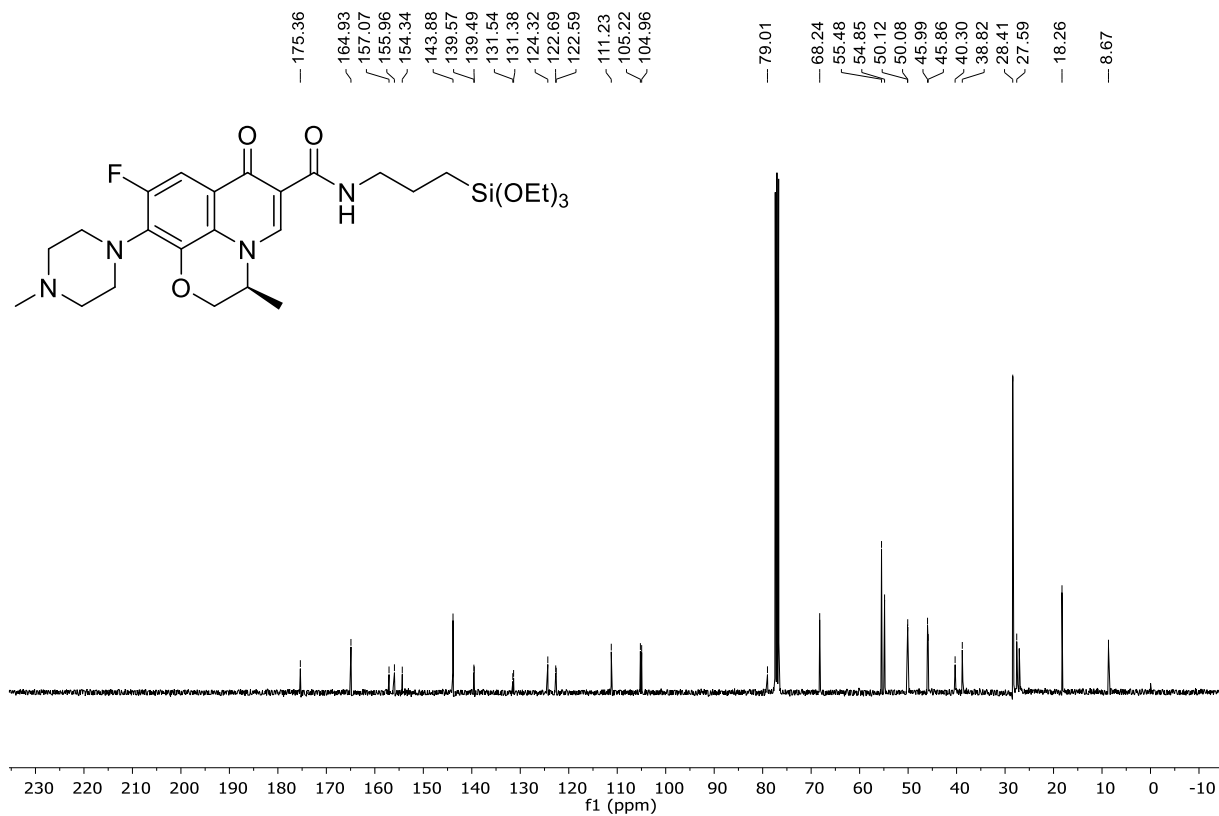

$^{13}\text{C}$  NMR (101 MHz,  $\text{CDCl}_3$ ) of compound **2b**

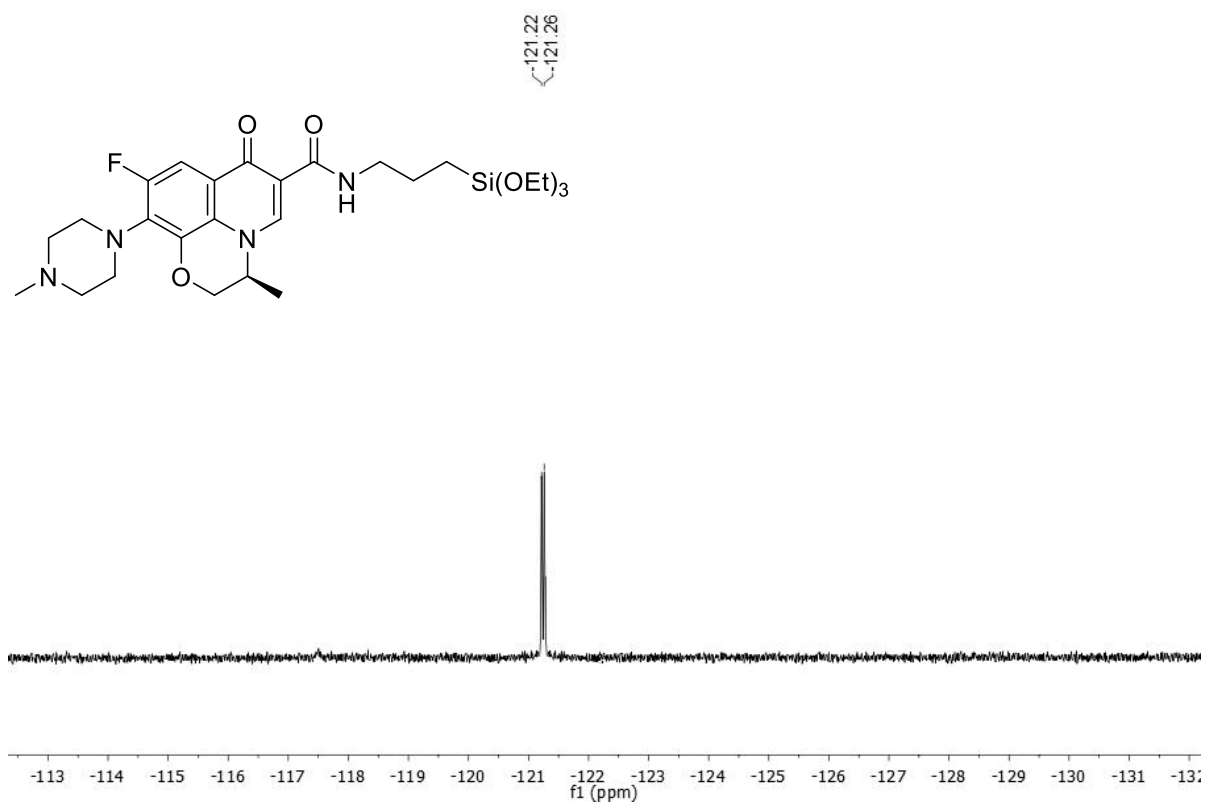

$^{19}\text{F}$  NMR (376 MHz,  $\text{CDCl}_3$ ) of compound **2b**

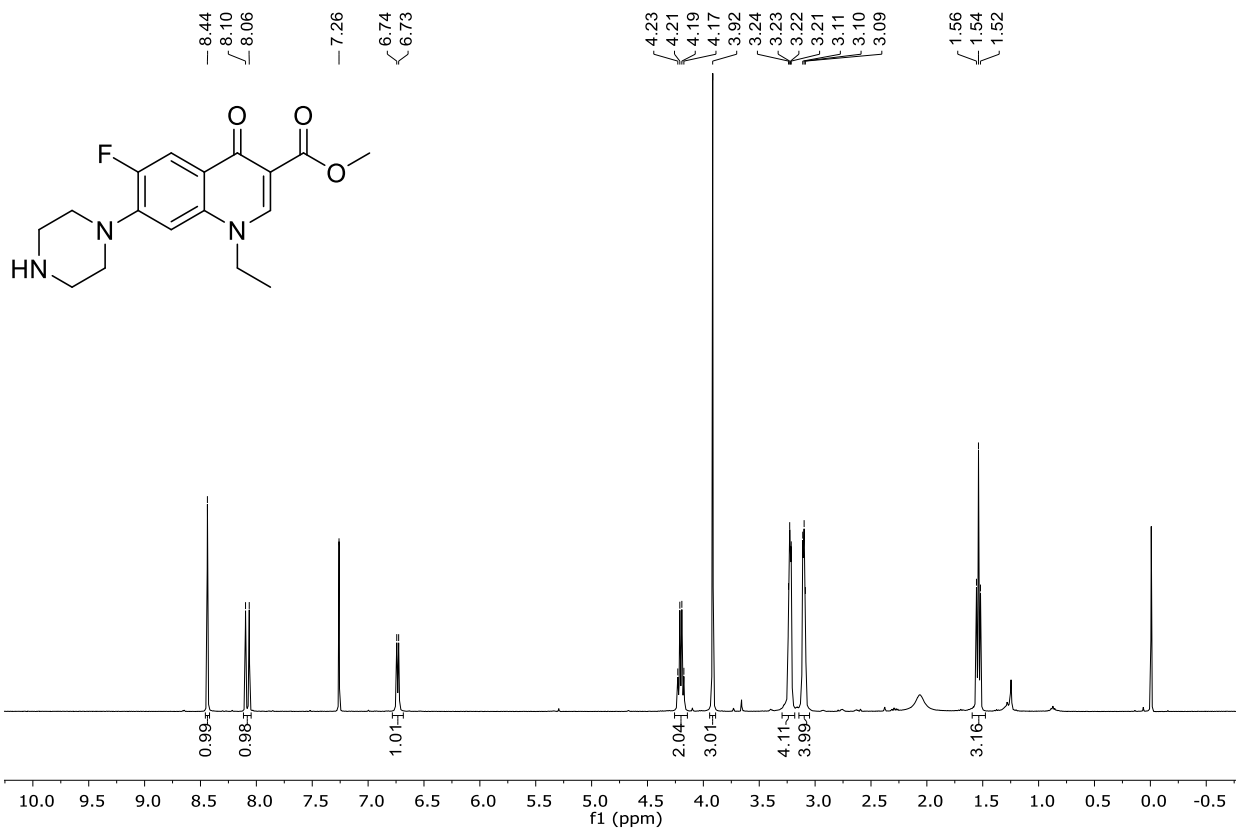

**<sup>1</sup>H NMR (400 MHz, CDCl<sub>3</sub>) of compound 3**

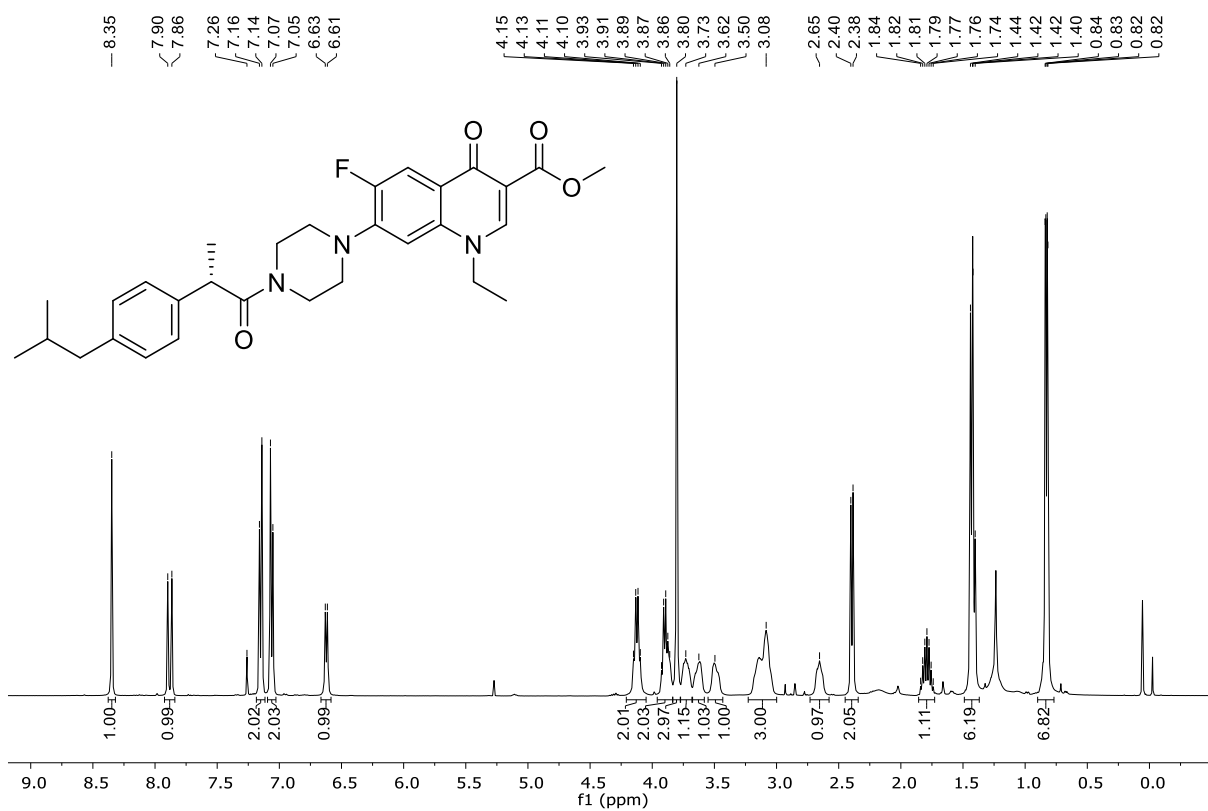

**<sup>1</sup>H NMR (400 MHz, CDCl<sub>3</sub>) of compound 4**

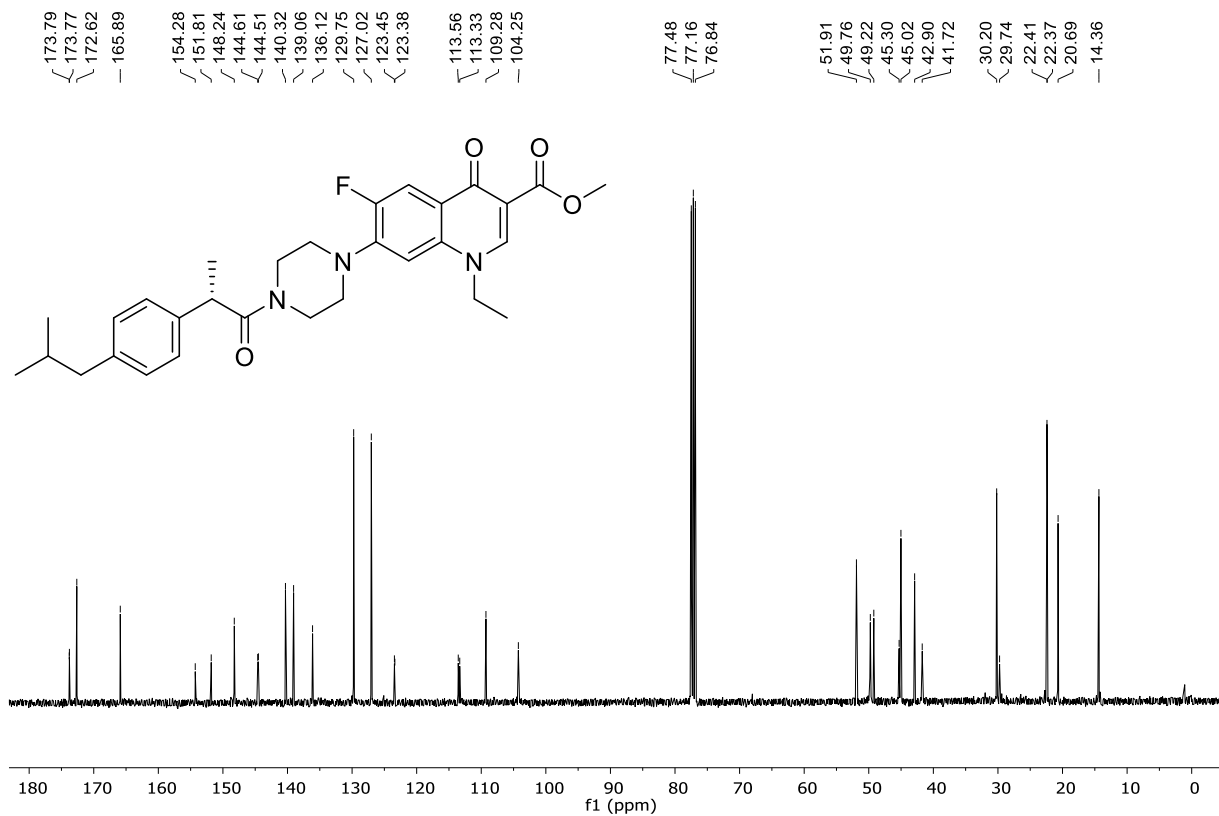

<sup>13</sup>C NMR (101 MHz, CDCl<sub>3</sub>) of compound 4

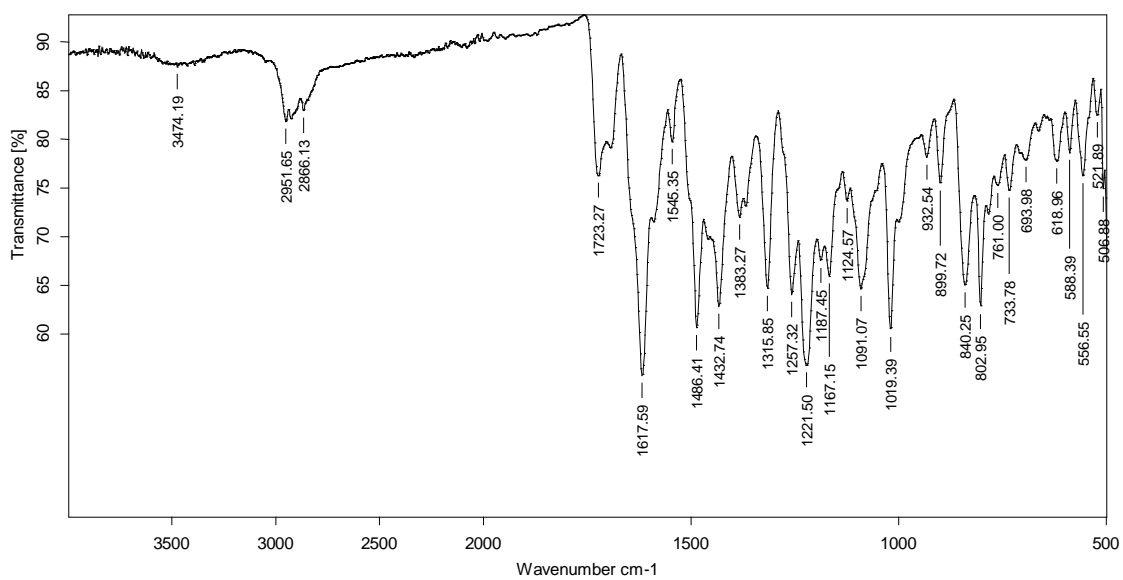

IR (ATR) of compound 4

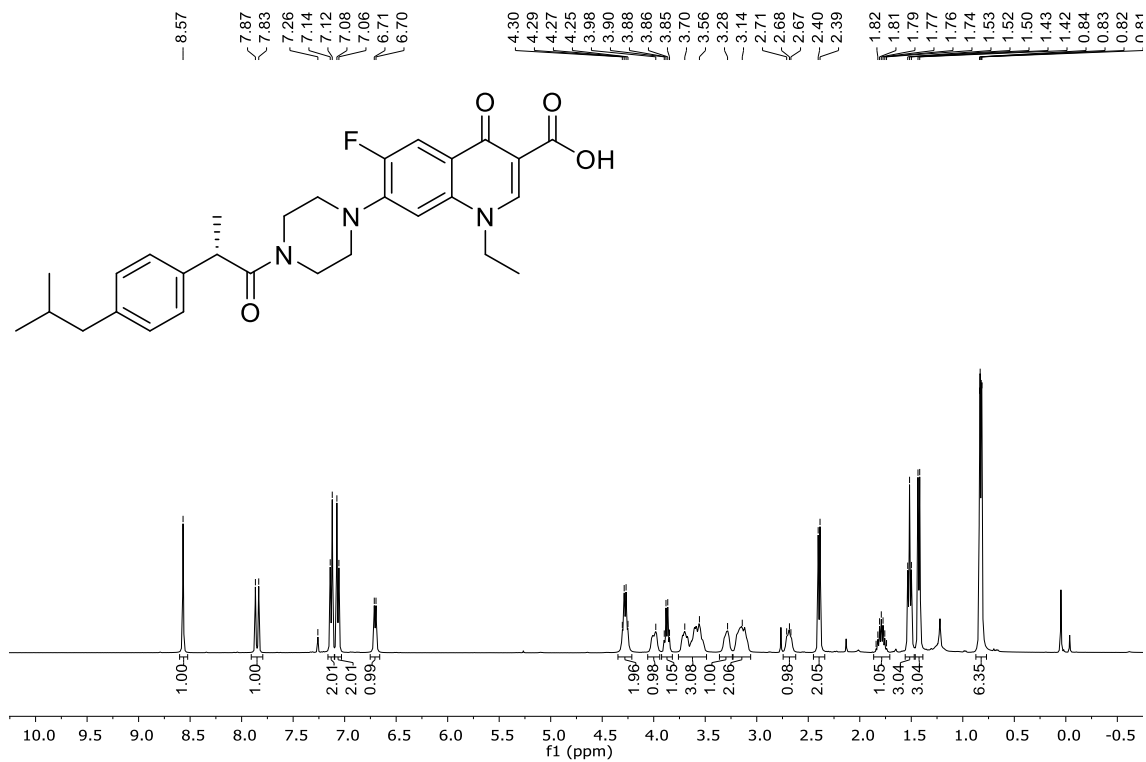

$^1\text{H NMR}$  (400 MHz,  $\text{CDCl}_3$ ) of compound 5

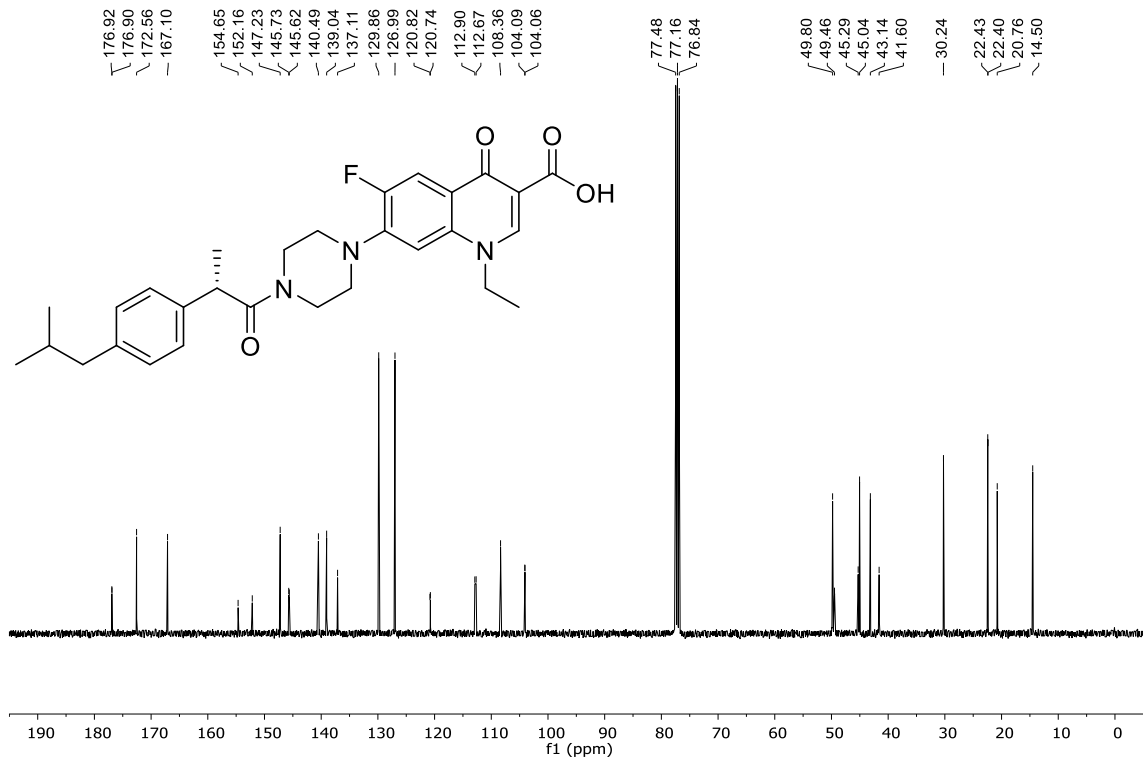

$^{13}\text{C NMR}$  (101 MHz,  $\text{CDCl}_3$ ) of compound 5

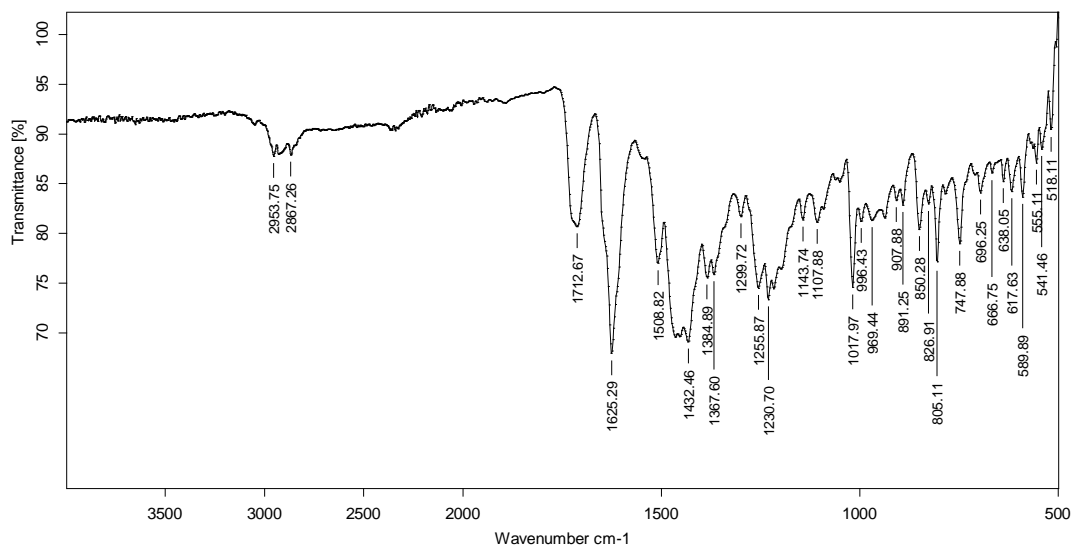

IR (ATR) of compound 5

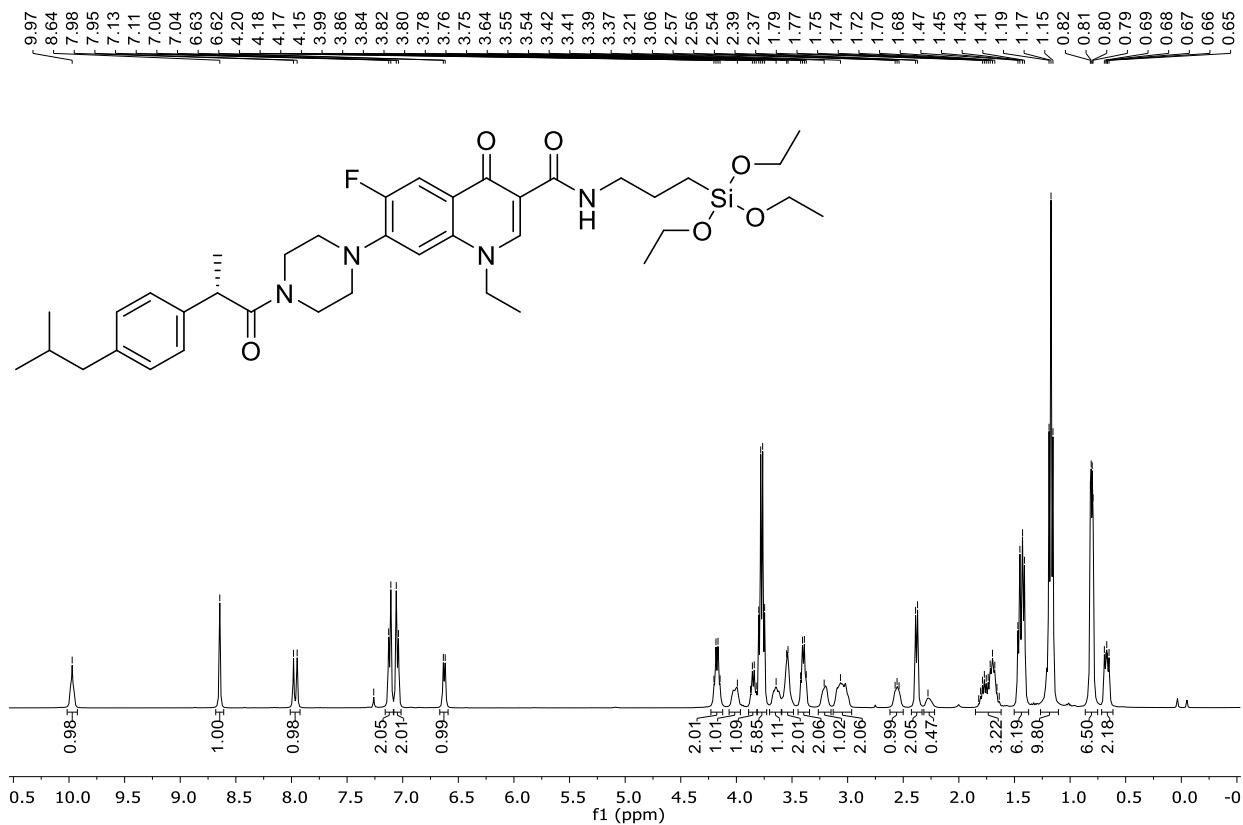

<sup>1</sup>H NMR (400 MHz, CDCl<sub>3</sub>) of compound 2c

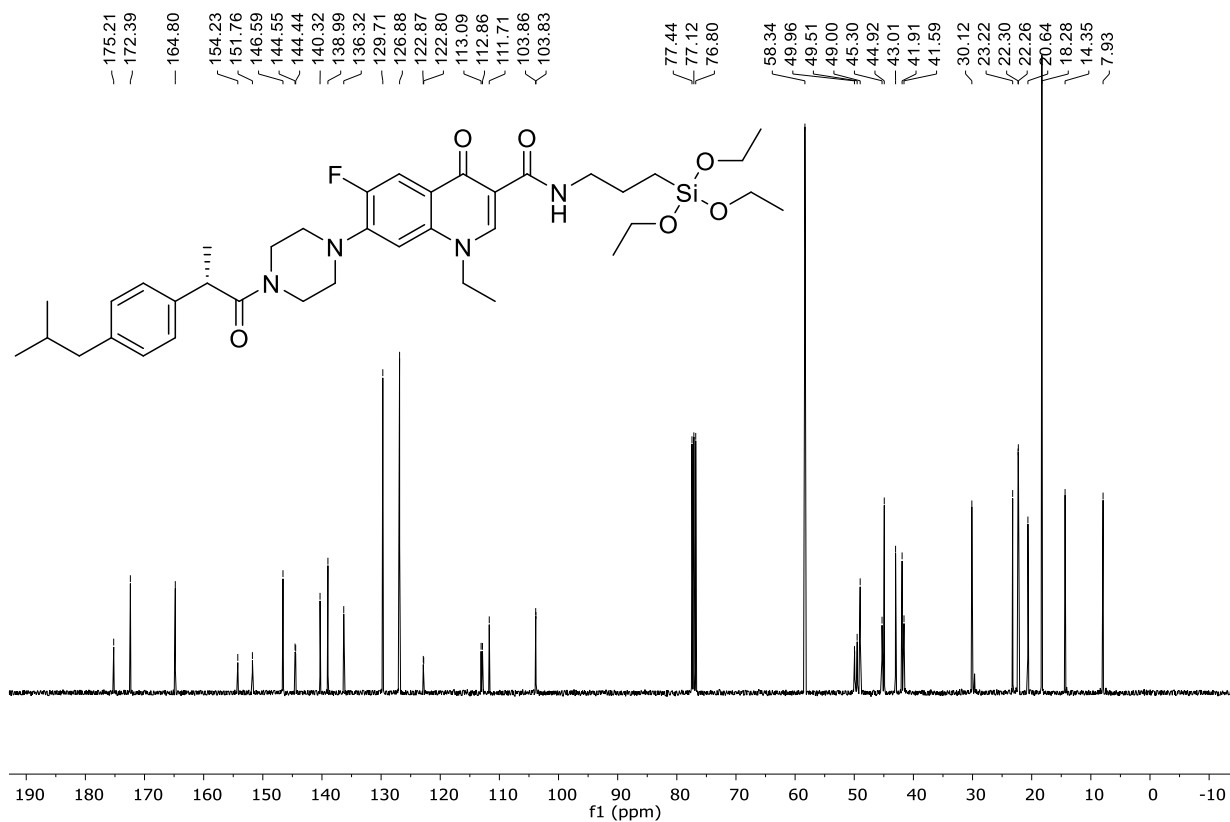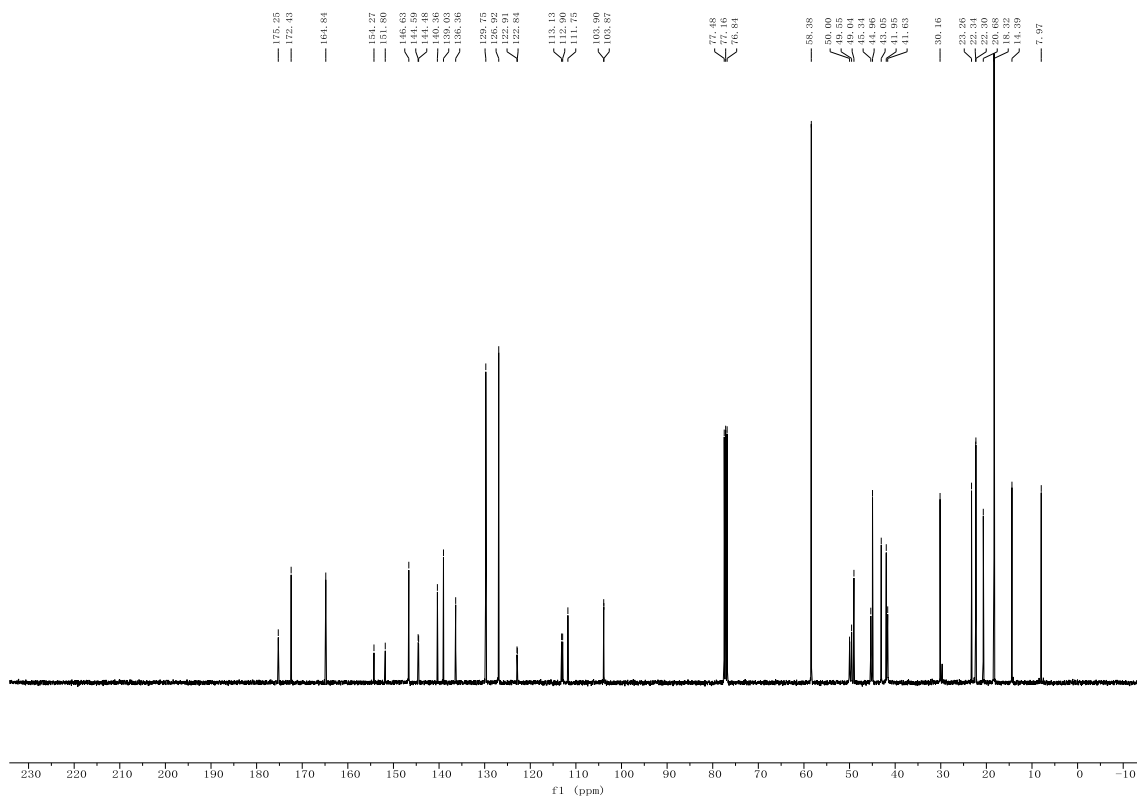

$^{13}\text{C}$  NMR (101 MHz,  $\text{CDCl}_3$ ) of compound 2c

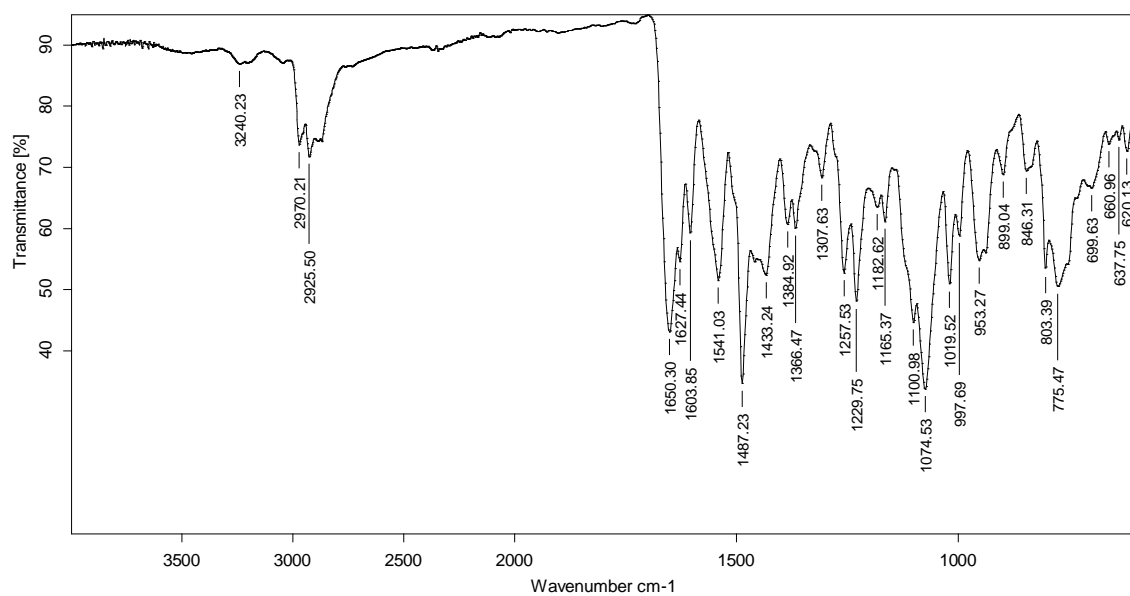

IR (ATR) of compound 2c

#### 4. Preparation and characterization of functionalized silica nanoparticles and fabrics

##### Preparation of SiO<sub>2</sub>@Ibu+Leflox (20:0.5:0.5)

TEOS (2.08 g, 10.0 mmol), the silylated anti-inflammatory ibuprofen **2a** (0.25 mmol) and silylated antibiotic levofloxacin **2b** (0.25 mmol) were dissolved in absolute EtOH (25 mL). Then, an ammonium hydroxide-ethanol solution (6 mL of 28% NH<sub>3</sub>·H<sub>2</sub>O in 25 mL EtOH) was added. The mixture was magnetically stirred (1400 rpm) at room temperature for 12 hours. Then the functionalized nanoparticles were collected by centrifugation (13500 rpm for 10 minutes) and washed with ethanol until neutral pH was reached. Then, the obtained solid was washed successively with Mili-Q water and 96% ethanol, and it was dried under vacuum for several hours.

##### Preparation of SiO<sub>2</sub>@Ibu+Leflox (20:0.75:0.25)

TEOS (3.53 g, 16.97 mmol), the silylated anti-inflammatory ibuprofen **2a** (0.63 mmol) and silylated antibiotic levofloxacin **2b** (0.21 mmol) were dissolved in absolute EtOH (42 mL). Then, an ammonium hydroxide-ethanol solution (10 mL of 28% NH<sub>3</sub>·H<sub>2</sub>O in 42 mL EtOH) was added. The mixture was magnetically stirred (1400 rpm) at room temperature for 12 hours. Then the functionalized nanoparticles were collected by centrifugation (13500 rpm for 10 minutes) and washed with ethanol until neutral pH was reached. Then, the obtained solid was washed successively with Mili-Q water and 96% ethanol, and it was dried under vacuum for several hours.

**SiO<sub>2</sub>@Ibu+Leflox (20:0.5:0.5)**: EA: 9.26% C, 2.02% H, 1.61% N (**2a** 0.23 mmol/g material **2b** 0.23 mmol/g material). IR v (ATR): 3274.8, 1051.1, 948.5, 800.1. DLS: 2733 nm, Zeta-potential: ζ = 5.7 mV.

**SiO<sub>2</sub>@Ibu+Leflox (20:0.75: 0.25)**: EA: 4.20% C, 1.83% H, 0.25% N (**2a** 0.075 mmol/g material **2b** 0.025 mmol/g material). IR v (ATR): 3302.3, 1054.3, 947.0, 796.1, 545.3. DLS: 426 nm, Zeta-potential: ζ = -41.0 mV.

##### General procedure for the preparation of SiO<sub>2</sub>@Norflox-Ibu

TEOS (2.08 g, 10.0 mmol) and the silylated derivative **2c** (0.5, 0.33 and 0.25 mmol) were dissolved in absolute EtOH (25 mL). Then, an ammonium hydroxide-ethanol solution was added (6 mL of 28% NH<sub>3</sub> H<sub>2</sub>O in 25 mL EtOH). The mixture was magnetically stirred (1400 rpm) at room temperature for 12 hours. The functionalized nanoparticles were collected by centrifugation



(13500 rpm for 10 minutes) and washed with ethanol until neutral pH was reached. Then, the obtained white solid was washed successively with Mili-Q water and 96% ethanol, and the nanomaterials were dried under high vacuum. We obtained **SiO<sub>2</sub>@Norflox-Ibu** with different ratios of TEOS and silylated drug **2c**.

**SiO<sub>2</sub>@Norflox-Ibu (20:1)**: EA: 1.96% C, 1.52% H, 0.86% N (0.15 mmol/g material). IR  $\nu$  (ATR): 3409.3, 1631.0, 1052.4, 948.1, 794.4, 522.7. Solid state <sup>13</sup>C-CP-MAS NMR (100.6 MHz)  $\delta$  (ppm): 175.6, 166.9, 140.0, 129.8, 111.4, 59.3, 45.3, 30.6, 22.1, 17.6, 14.2. <sup>29</sup>Si-CP-MAS NMR (79.5 MHz)  $\delta$  (ppm): -58.35 (T<sup>2</sup>), -66.77 (T<sup>3</sup>), -102.34 (Q<sup>3</sup>), -112.08 (Q<sup>4</sup>). DLS: 836 nm, Zeta-potential:  $\zeta$  = -65.5 mV.

**SiO<sub>2</sub>@Norflox-Ibu (30:1)**: EA: 2.52% C, 1.69% H, 0.74% N (0.13 mmol/g material). IR  $\nu$  (ATR): 3283.5, 1637.8, 1058.2, 953.5, 795.9, 543.6. DLS: 658 nm, Zeta-potential:  $\zeta$  = -69.9 mV.

**SiO<sub>2</sub>@Norflox-Ibu (40:1)**: EA: 1.61% C, 1.63% H, 0.84% N (0.15 mmol/g material). IR  $\nu$  (ATR): 3374.0, 1630.1, 1053.6, 949.4, 792.7, 565.7. <sup>29</sup>Si-CP-MAS NMR (79.5 MHz)  $\delta$  (ppm): -56.53 (T<sup>2</sup>), -65.38 (T<sup>3</sup>), -92.36 (Q<sup>2</sup>), -101.83 (Q<sup>3</sup>), -112.39 (Q<sup>4</sup>). DLS: 486 nm, Zeta-potential:  $\zeta$  = -72.3 mV.

### **SiO<sub>2</sub>@Ibu+Leflox (20:0.5:0.5)**

#### **DLS**

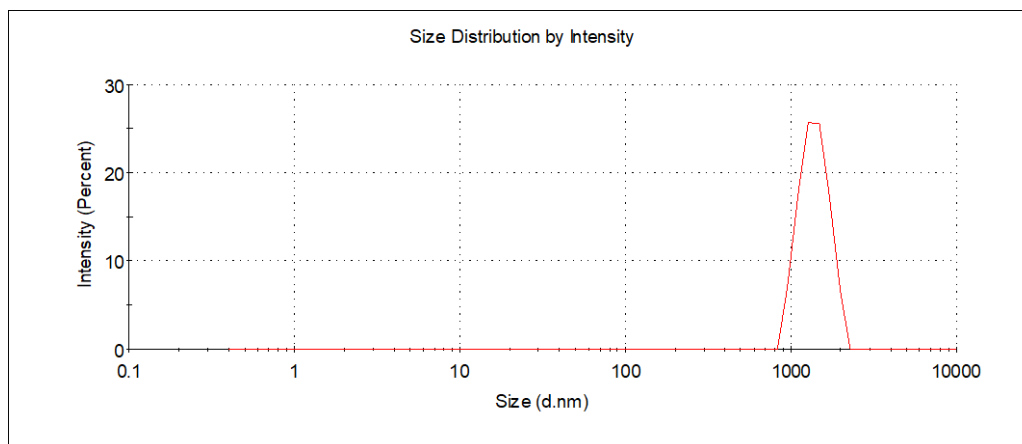

## Zeta-potential

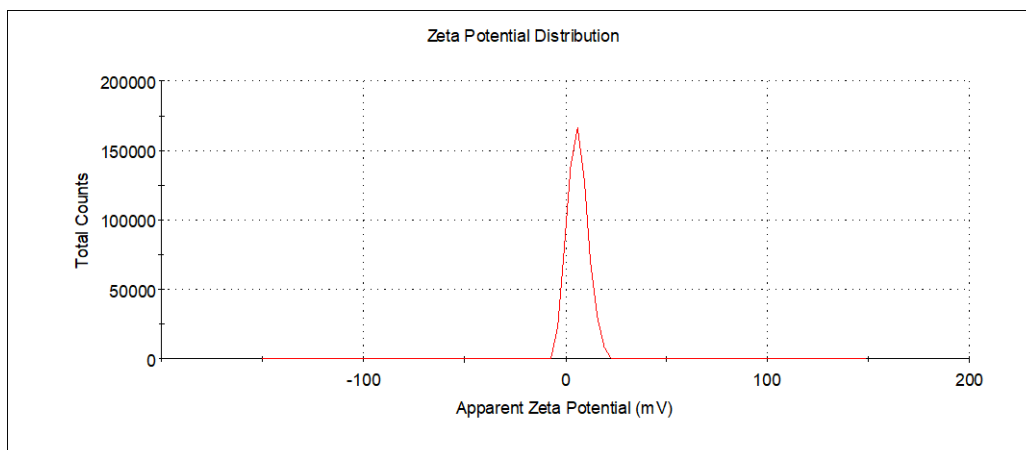

## TEM

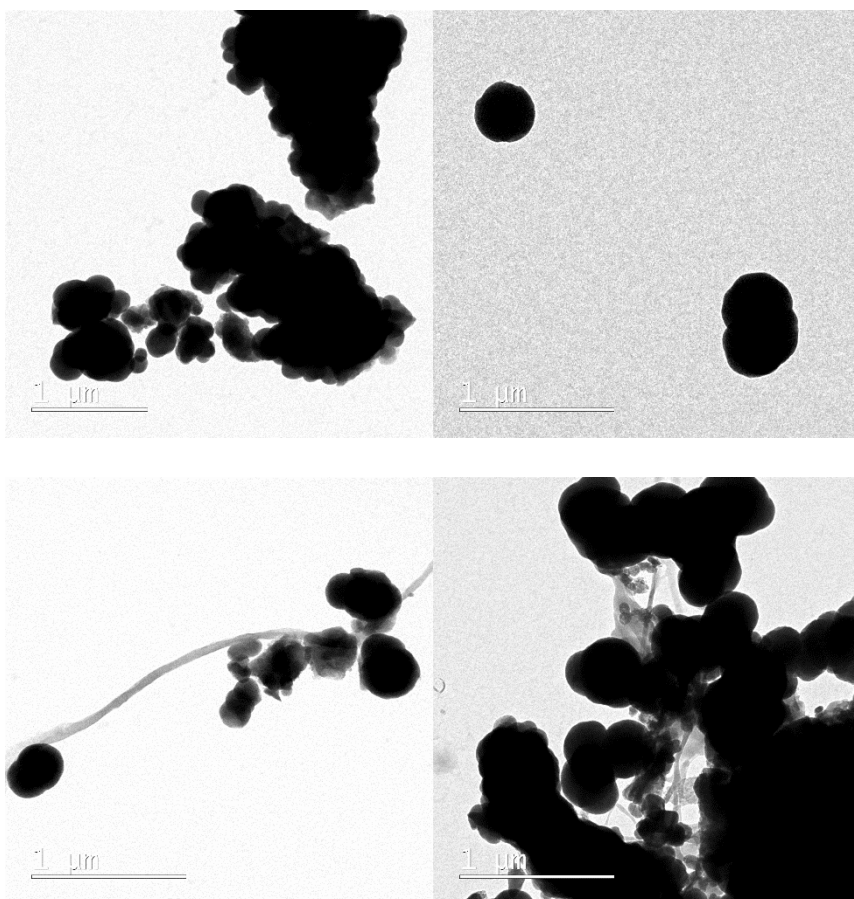

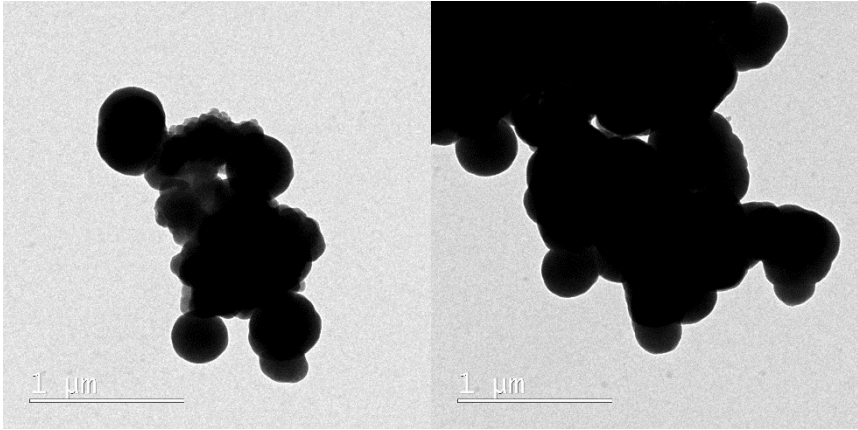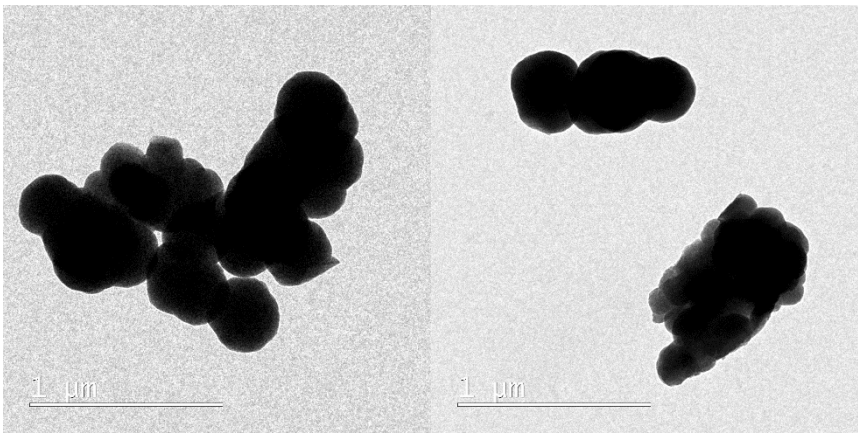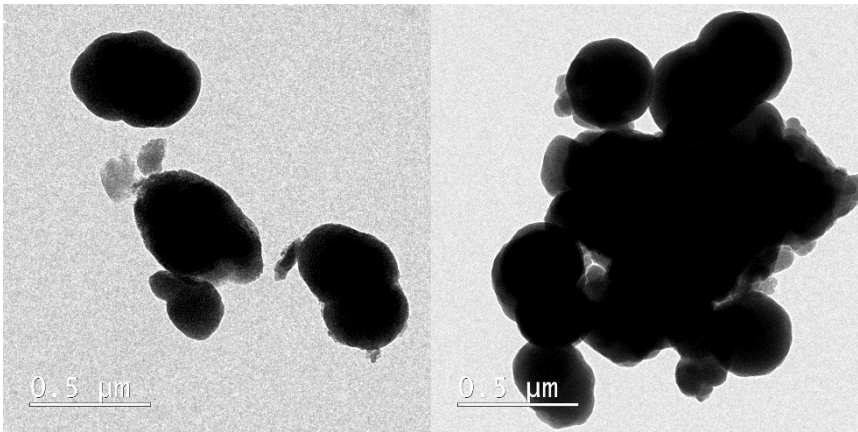

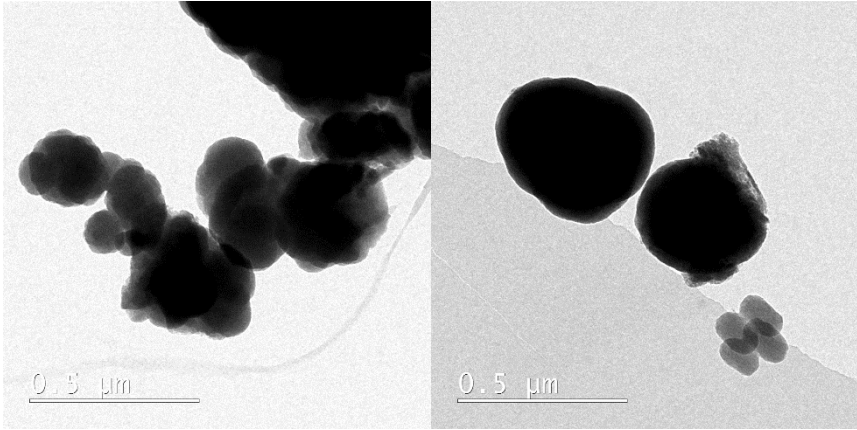

**IR (ATR)**

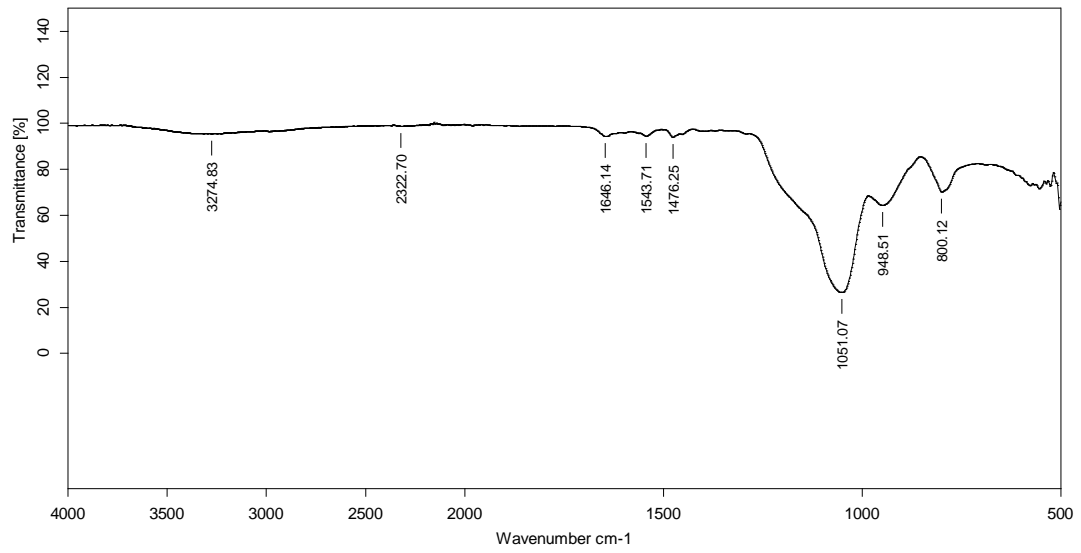

**SiO<sub>2</sub>@Ibu+Leflox (20:0.75: 0.25)**

**DLS**

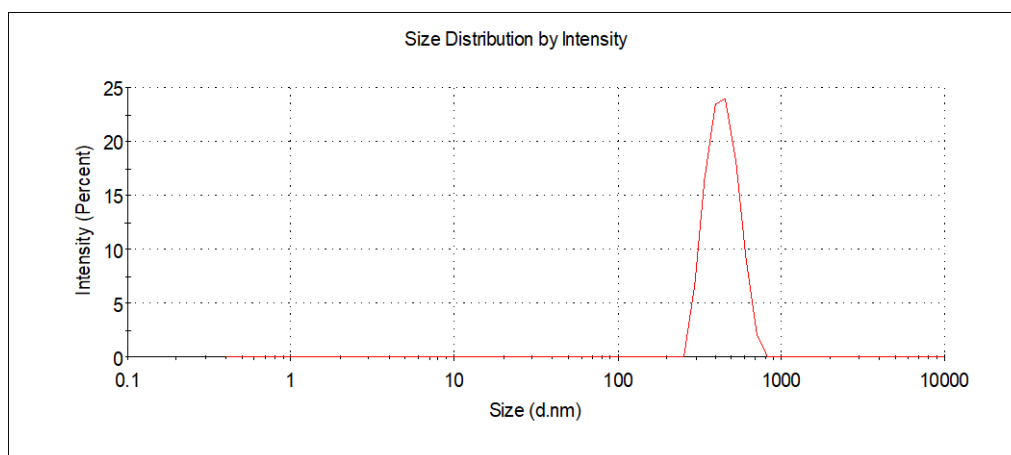

**Zeta-potential**

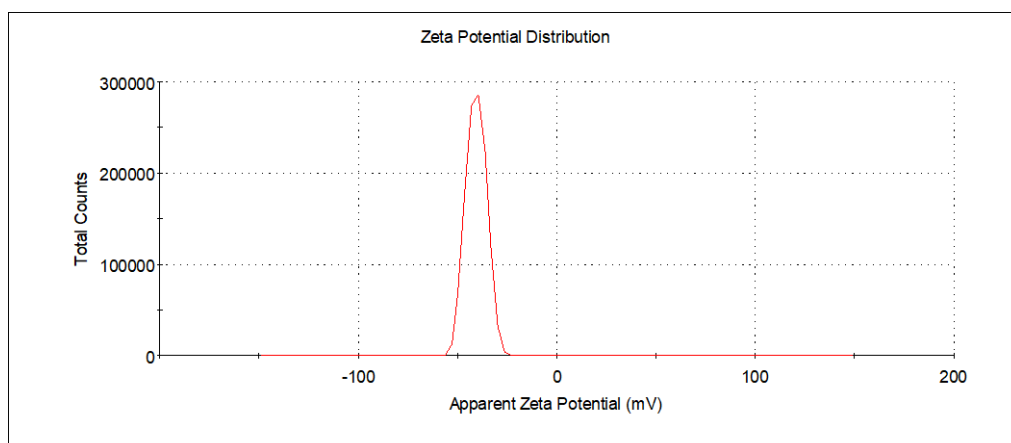

## TEM

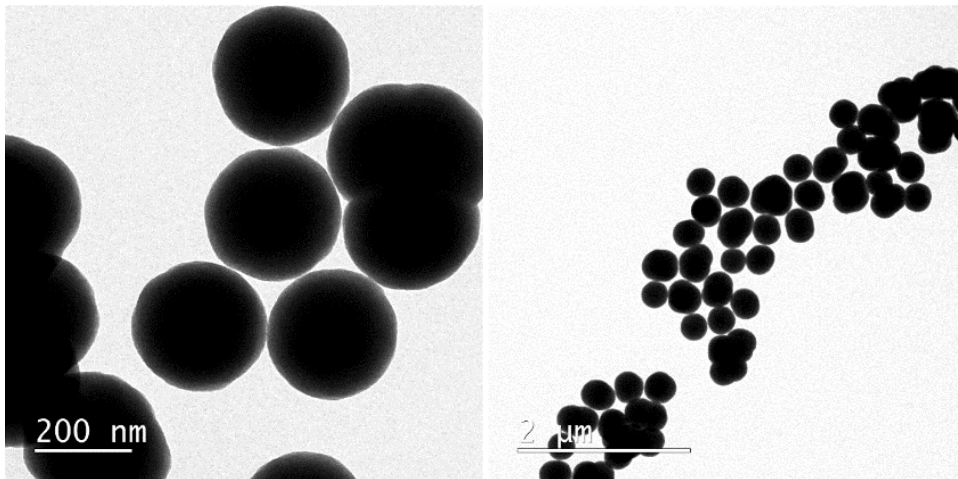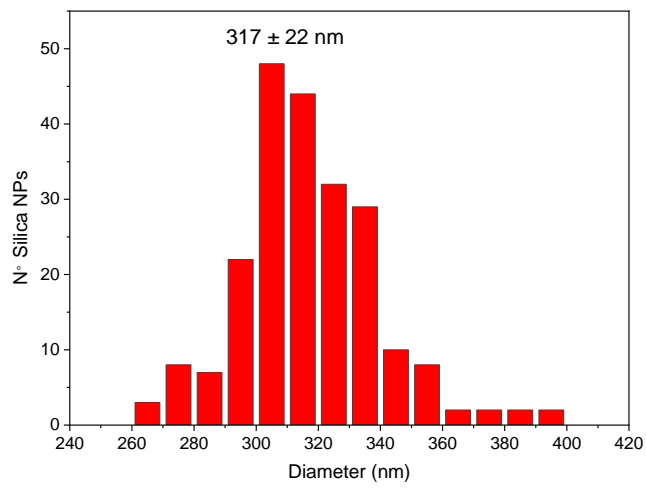

## ATR

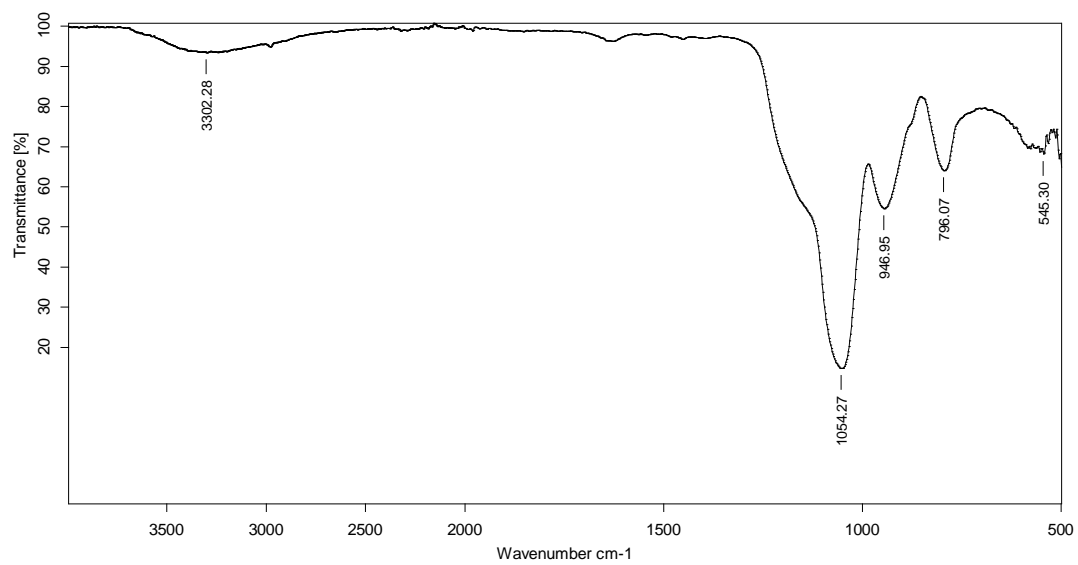

**SiO<sub>2</sub>@Norflox-Ibu (TEOS: 2c (20:1))**

**DLS**

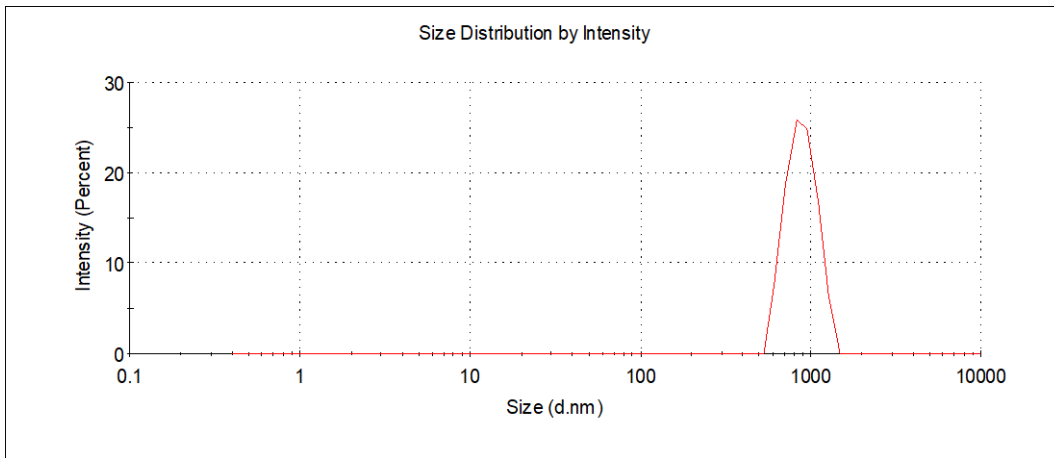

**Zeta-potential**

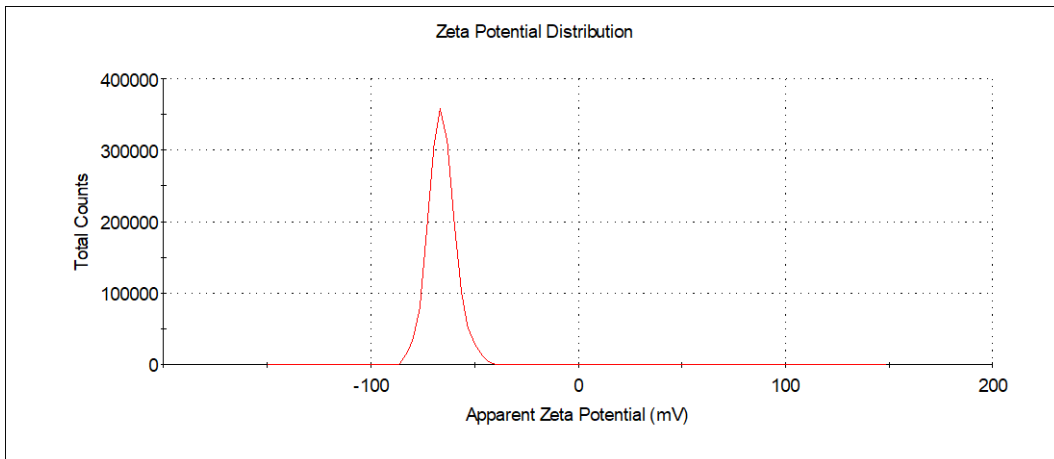

**TEM**

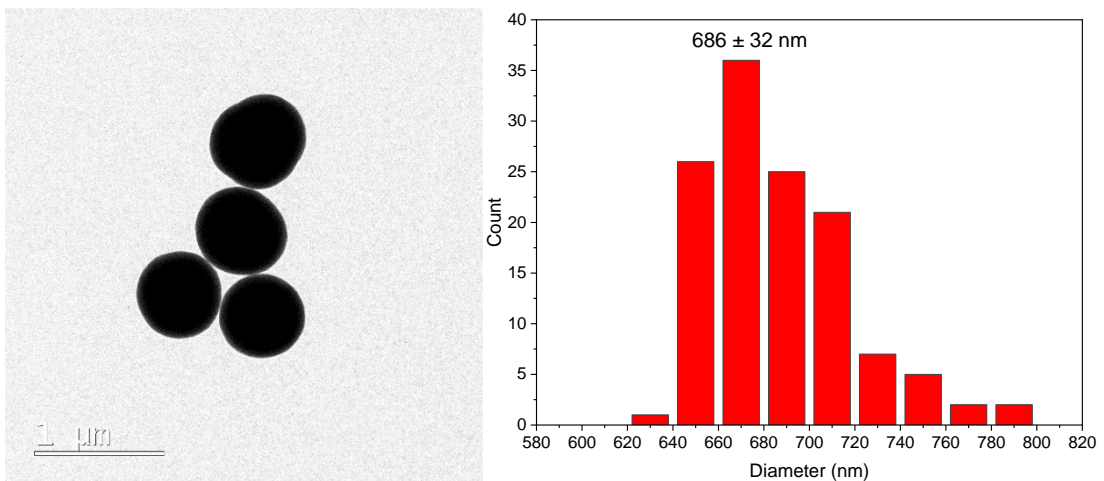

# Solid state $^{13}\text{C}$ NMR and $^{29}\text{Si}$ NMR

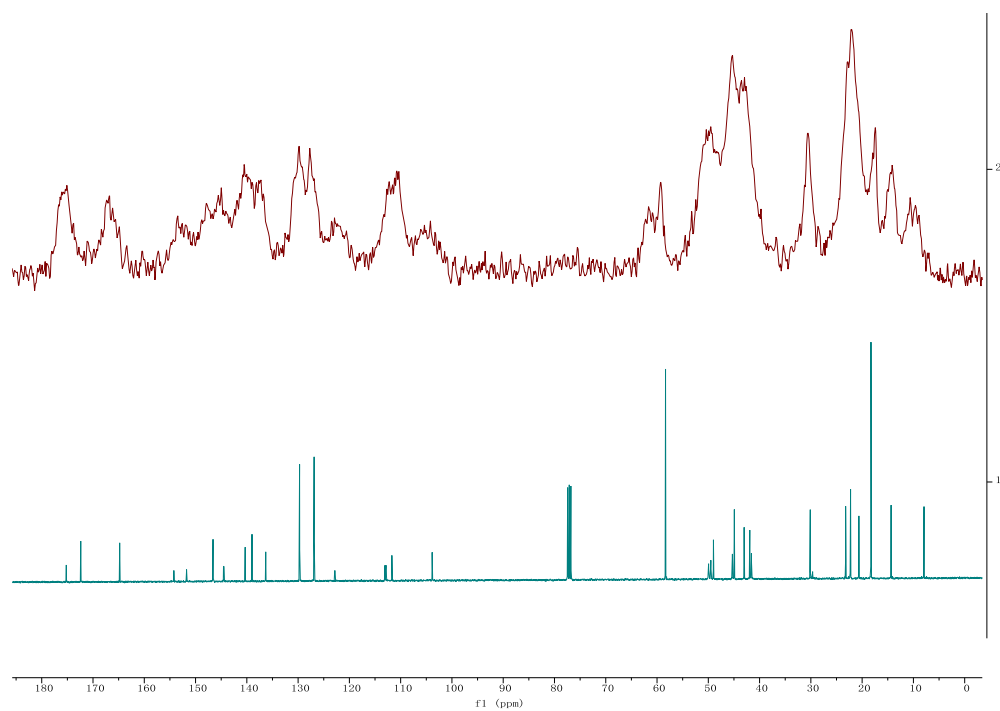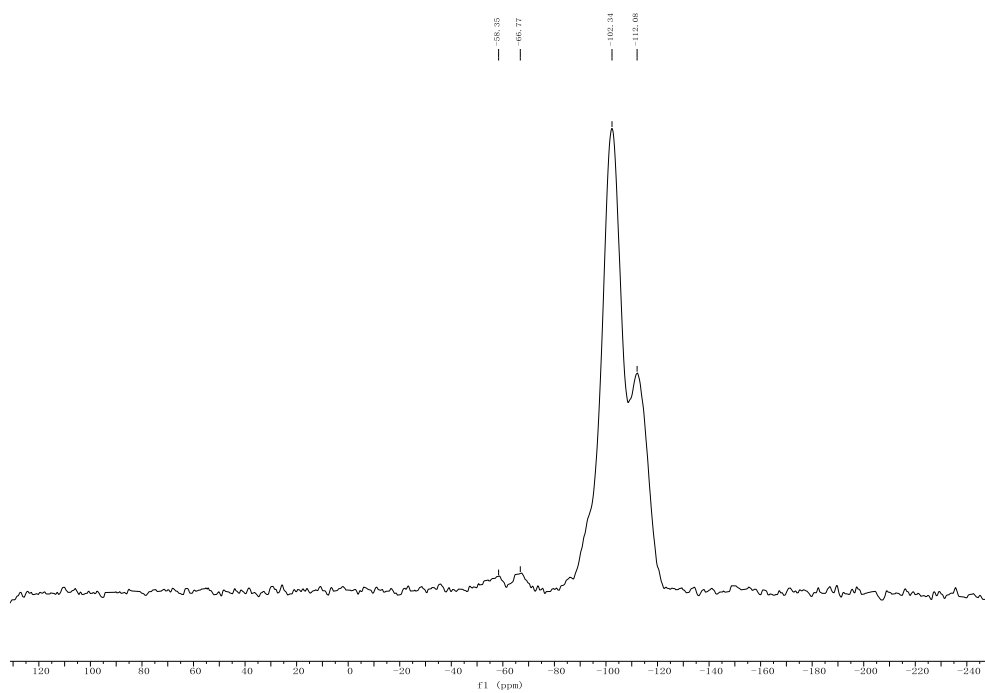



### IR (ATR)

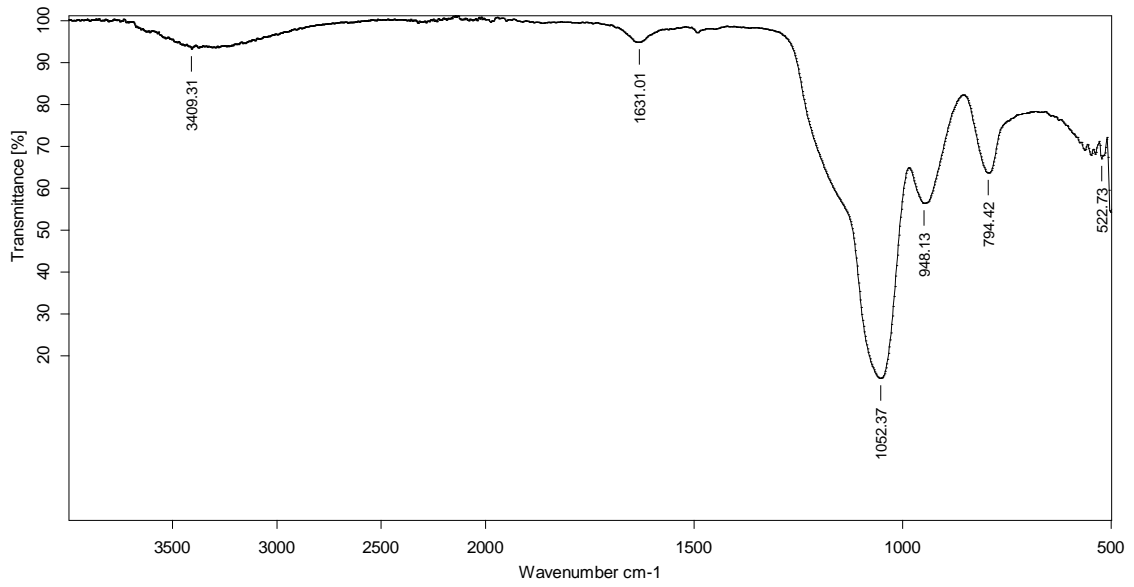

### SiO<sub>2</sub>@Norflox-Ibu (TEOS: 2c (30:1))

### DLS

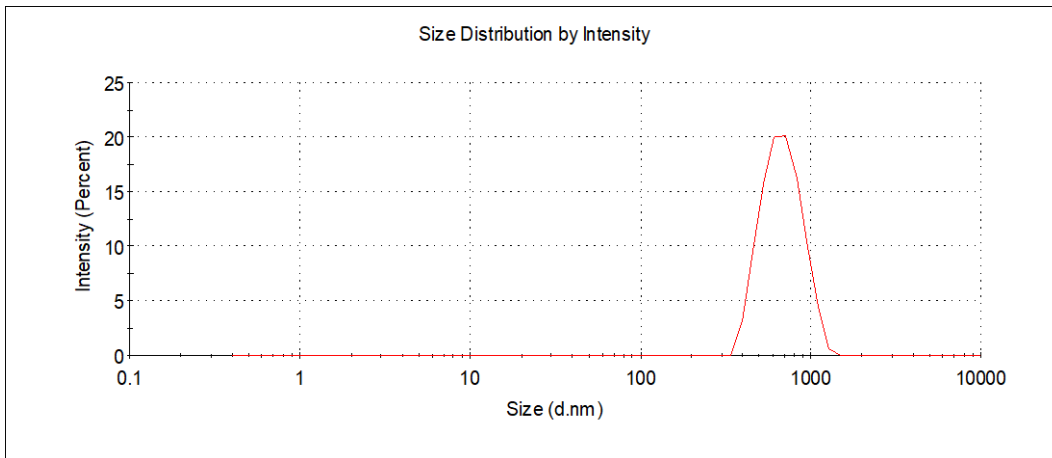

## Zeta-potential

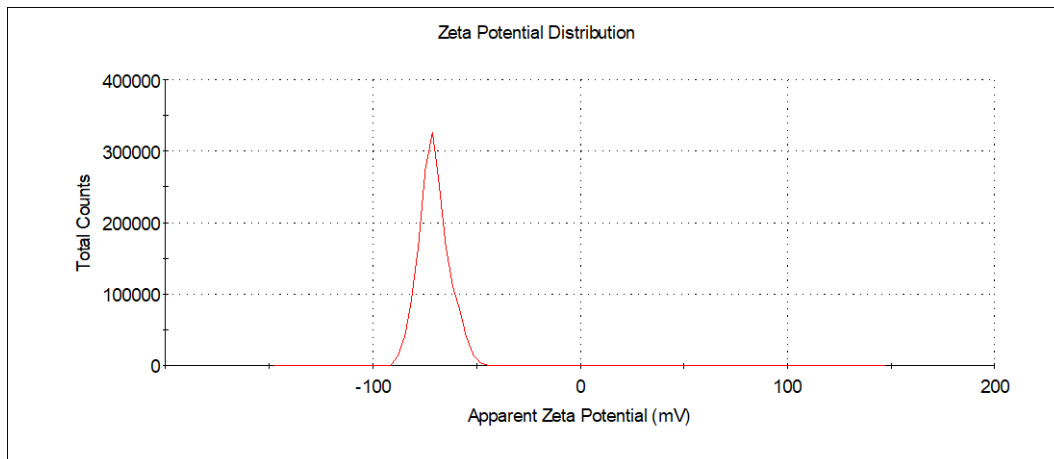

## TEM

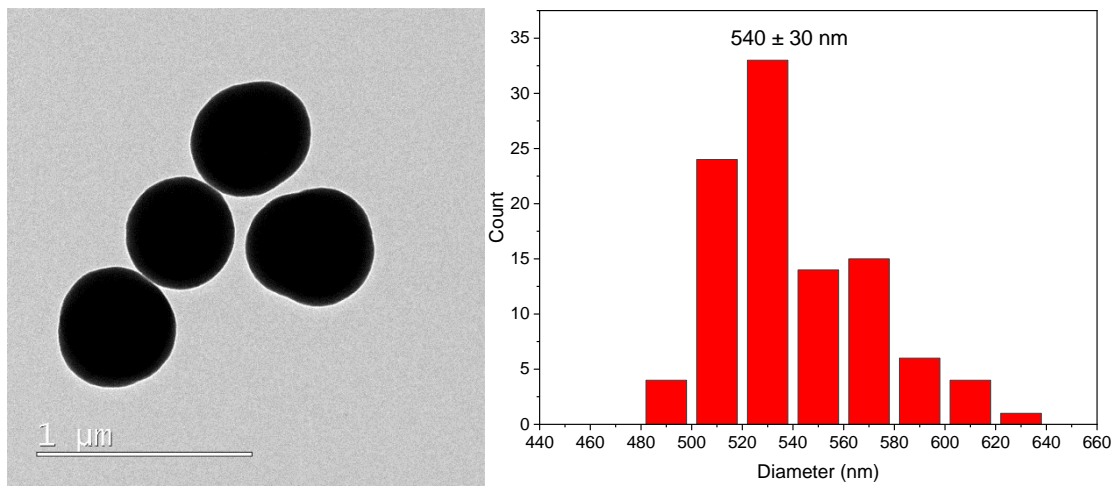

## IR (ATR)

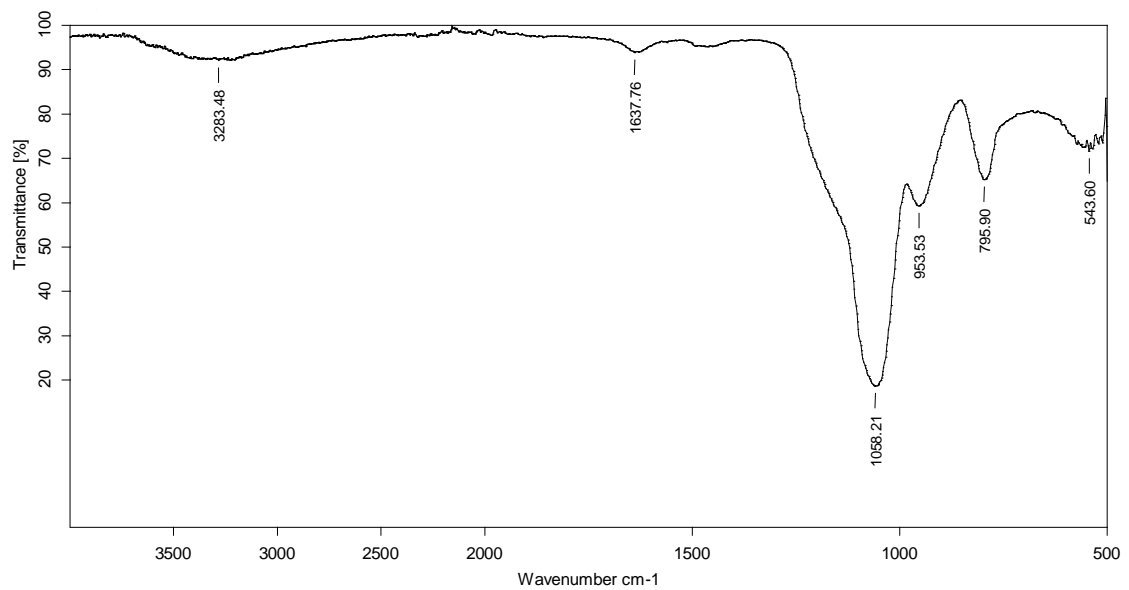

**SiO<sub>2</sub>@Norflox-Ibu (TEOS: 2c (40:1))**

**DLS**

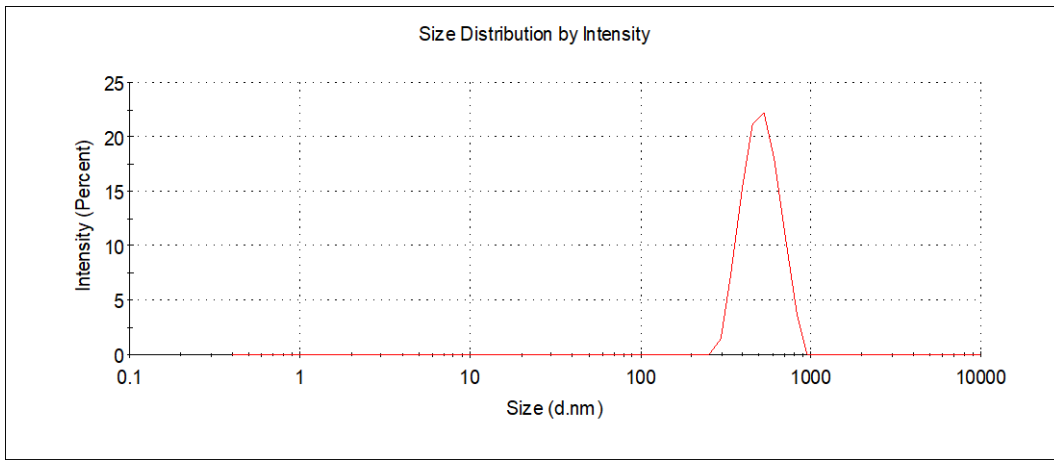

**Zeta-potential**

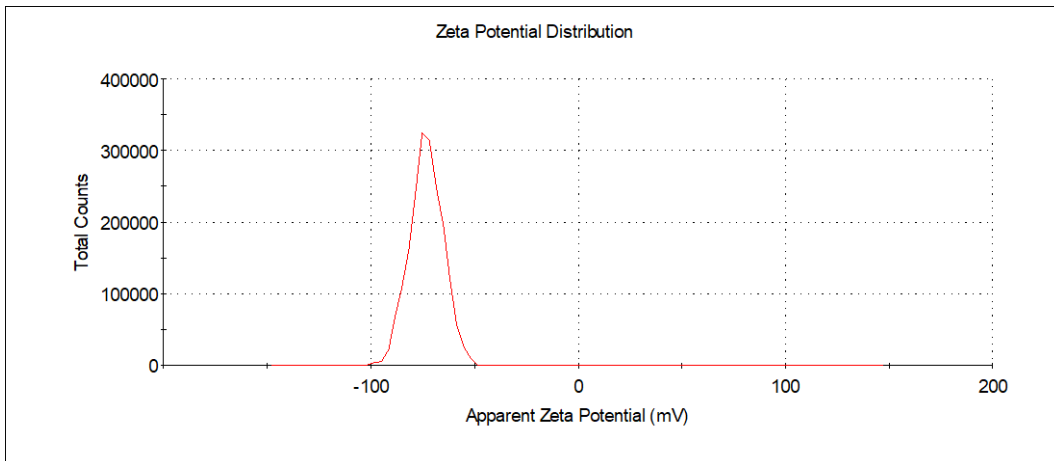

**TEM**

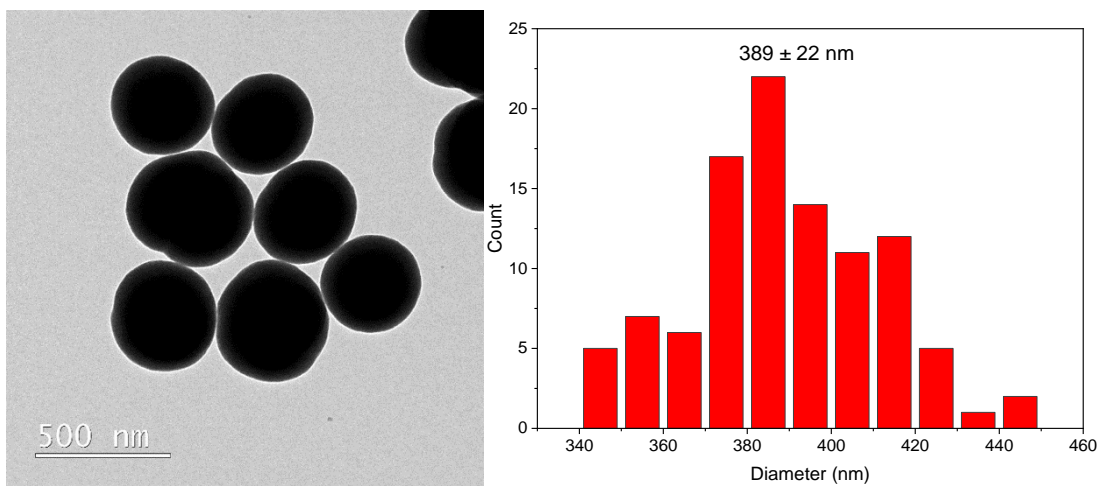

## Solid state $^{29}\text{Si}$ NMR

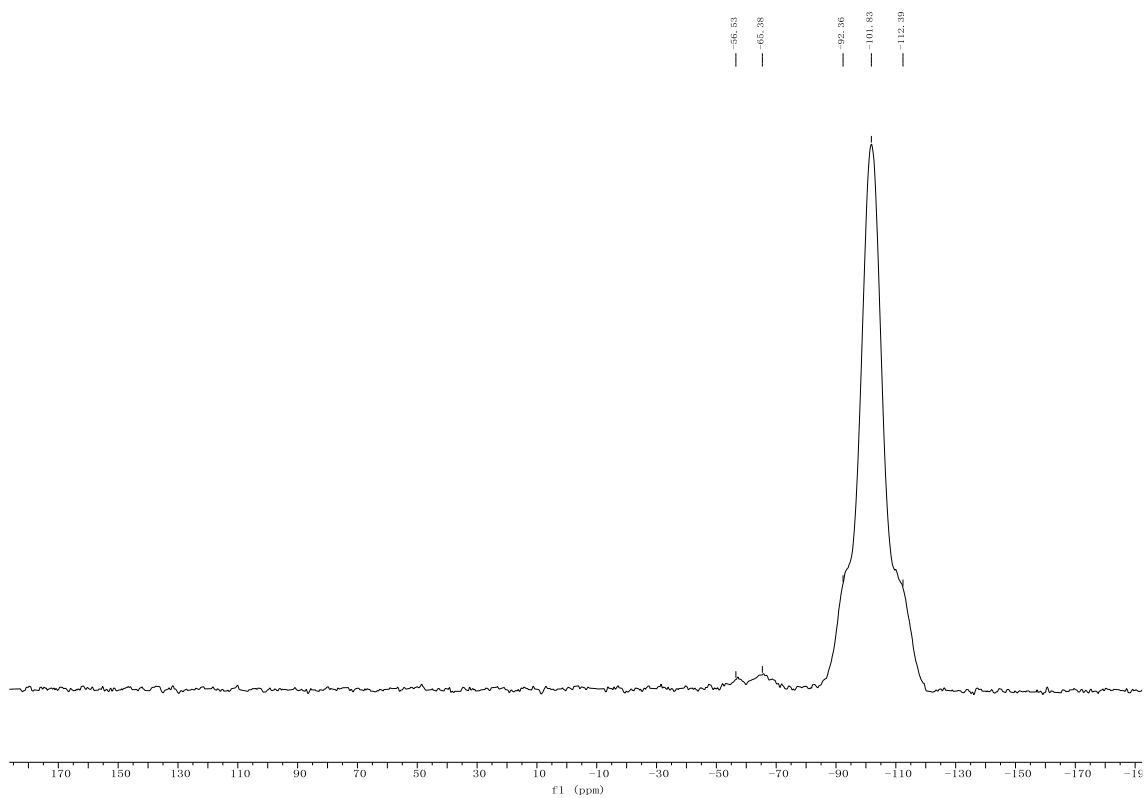

## IR (ATR)

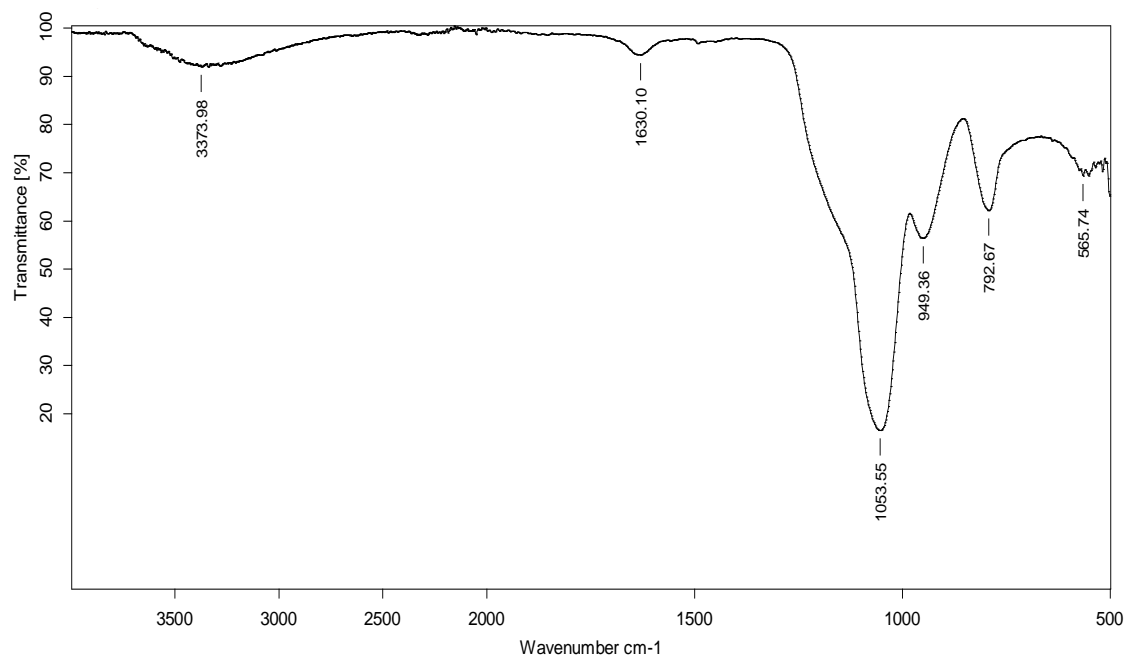

## Procedure for the preparation of cotton fabrics coated with functionalized silica nanoparticles $\text{SiO}_2$ @Norflox-Ibu (40:1)

Tetraethoxysilane (2.08 g, 10.0 mmol) and the corresponding silylated bifunctional derivative **2c** (0.25 mmol) were dissolved in absolute EtOH (25 mL). Then, an ammonium hydroxide-ethanol solution was added (6 mL of 28%  $\text{NH}_3 \text{H}_2\text{O}$  in 25 mL EtOH). The mixture was magnetically stirred intensively (1400 rpm) at room temperature for 12 hours and then ultrasonicated for 30 min. Afterwards, a piece of clean cotton fabric ( $3 \times 3$  cm) was immersed in the solution and the solution was ultrasonicated for 30 min. After 30 min, the cotton fabric was removed from the solution, washed with water and ethanol for several times and dried in a vacuum oven at  $50^\circ\text{C}$  for 12 h.

## Characterization of a coated cotton fabric with $\text{SiO}_2$ @Norflox-Ibu (TEOS: **2c** (40:1))

### Fabric- $\text{SiO}_2$ @Norflox-Ibu (40:1)

#### SEM

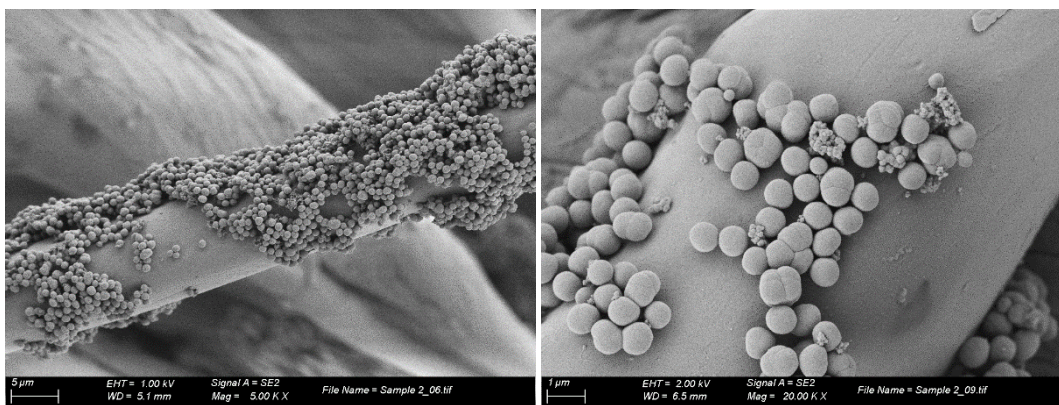

#### EDX mapping

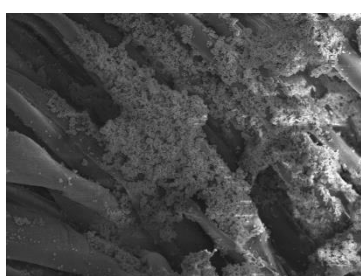

Electron Image 1

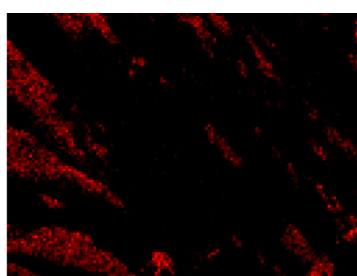

C Ka1\_2

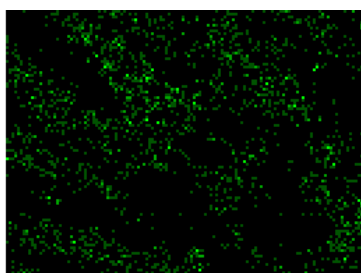

N Ka1\_2

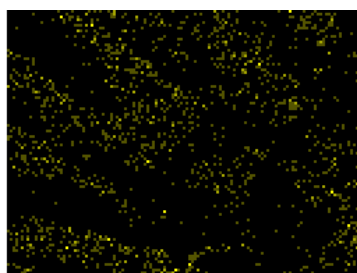

F Ka1\_2

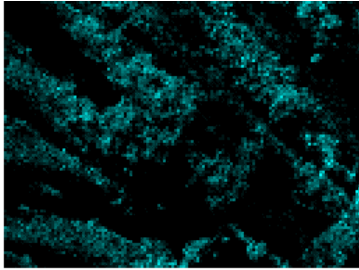

O Ka1

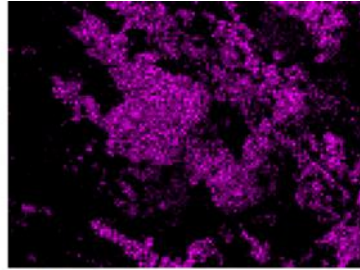

Si Ka1

**EDX linear scanning**

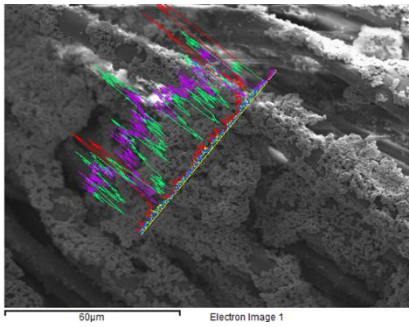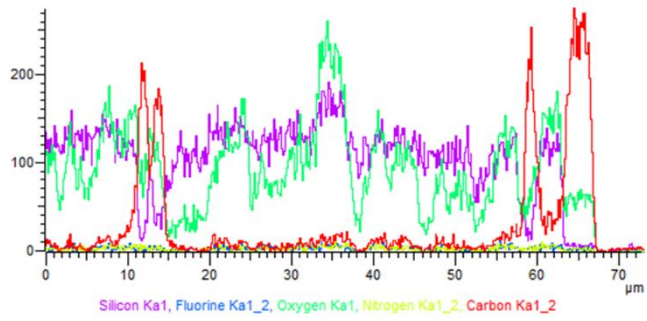

| Element | App<br>Conc. | Intensity<br>Corrn. | Weight% | Weight%<br>Sigma | Atomic% |
|---------|--------------|---------------------|---------|------------------|---------|
| C K     | 71.22        | 0.8193              | 24.23   | 0.29             | 34.07   |
| N K     | 0.69         | 0.4052              | 0.47    | 0.29             | 0.57    |
| O K     | 267.17       | 1.6888              | 44.09   | 0.29             | 46.55   |
| F K     | 0.33         | 0.5990              | 0.15    | 0.14             | 0.14    |
| Si K    | 121.39       | 1.0893              | 31.06   | 0.23             | 18.68   |
| Totals  |              |                     | 100.00  |                  |         |

# ATR

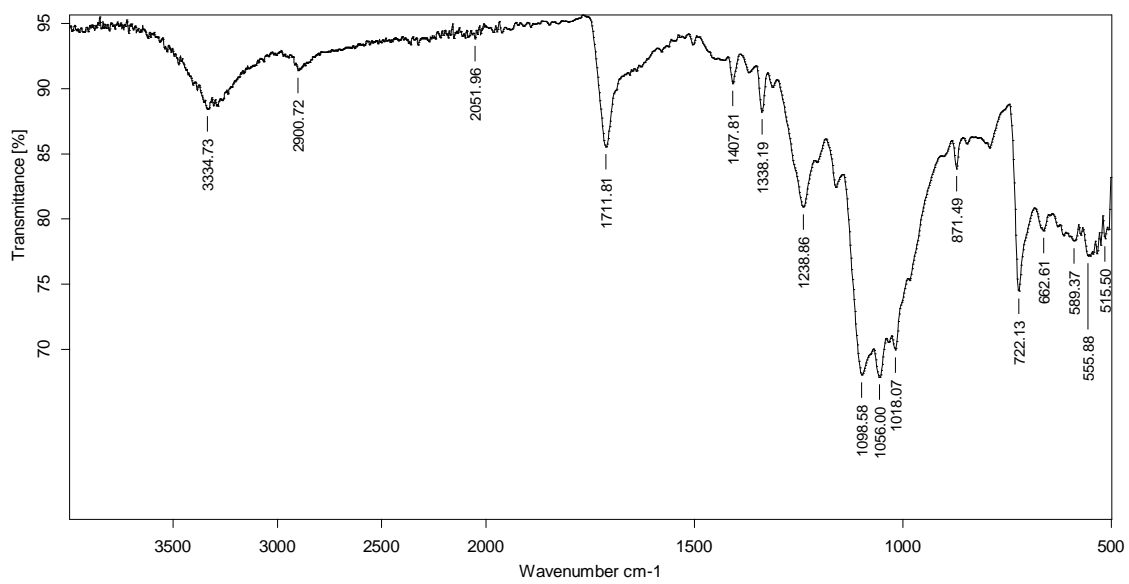

## 5. Treatment of functionalized silica nanoparticle SiO<sub>2</sub>@Norflox-Ibu (40:1) with proteases for quantitative analysis by UV-Vis

The functionalized silica nanoparticles (20 mg) were dispersed in phosphate-buffered saline (PBS, pH 7.4) (2 mL) in an eppendorf tube, the corresponding protease (see Table 2 in the manuscript) was added and the mixture was gently stirred at 37 °C for the given time (orbital shaker). The concentration of protease was 0.2 mM. Then, after removal of nanoparticles by centrifugation, the supernatant was extracted with dichloromethane (10 × 3 mL). The solvent was removed under vacuum from the combined organic phases. The residue was dissolved in acetonitrile and the solution was analyzed by UV-vis (Ibuprofen 220 nm, Norfloxacin 285 nm).

## 6. Treatment of functionalized silica nanoparticle SiO<sub>2</sub>@Norflox-Ibu (40:1) with proteases for qualitative detection of Norfloxacin

The functionalized silica nanoparticles (20 mg) were dispersed in phosphate-buffered saline (PBS) (2 mL) in an eppendorf tube, the corresponding protease was added and the mixture was gently stirred at 37 °C for 48 h (orbital shaker). The concentration of protease was 0.2 mM. Glacial acetic acid (2 mL) was added and the mixture was stirred for 30 min. Then after removal of nanoparticles by centrifugation, the supernatant was diluted to 10 mL and the aqueous solution was analyzed by UV-vis. The commercial norfloxacin aqueous solution (0.24 mmol/L) was prepared with the same amount of glacial acetic acid and was analyzed by UV-vis (285 nm).

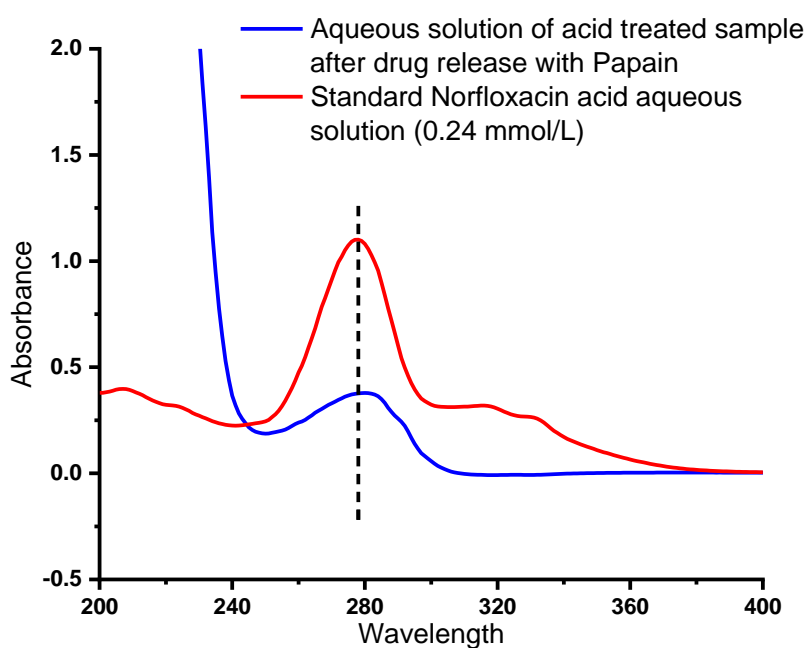

*Qualitative detection of Norfloxacin by UV-Vis after treatment of SiO<sub>2</sub>@Norflox-Ibu (TEOS:2c 40:1) with papain for 48 h*



## 7. Treatment of cotton fabrics coated with functionalized silica nanoparticles with proteases

A piece of **Fabric-SiO<sub>2</sub>@Norflox-Ibu (40:1)** (3 × 3 cm) was cut into small pieces and dispersed in phosphate-buffered saline (PBS) (5 mL) in an eppendorf tube, the corresponding protease was added and the mixture was gently stirred at 37 °C for 48 h (orbital shaker). The concentration of protease was 0.2 mM. After the removal of cotton fabrics, the supernatant was extracted with dichloromethane (25 × 3 mL). The solvent was removed under vacuum from the combined organic phases. The residue was dissolved in acetonitrile and the solution was analyzed by UV-vis.

## 8. Inhibitory tests of bacterial growth

The supernatants of papain treated **SiO<sub>2</sub>@Norflox-Ibu (TEOS:2c 40:1)** and **Fabric-SiO<sub>2</sub>@Norflox-Ibu (TEOS:2c 40:1)** were used to test the inhibitory effects of the released Norfloxacin on the growth of *S. Aureus*.

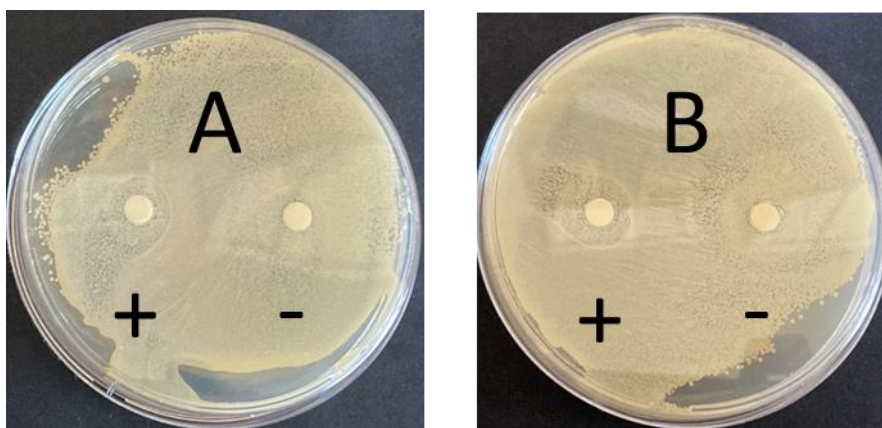

**Bacterial (*S. Aureus*) growth is inhibited** by the supernatants of the cotton fabrics (A) or nanoparticles (B) loaded with norfloxacin-ibuprofen. In each Petri plate we show the inhibition of bacterial growth after 24 h/37°C incubation with (+) or without (-) papain. In both cases, digestion with papain enhances the release of norfloxacin resulting in wider growth inhibition halo
